# Supplementary material for: Impact of Guideline Markings on Saturation Flow Rate at Signalized Intersections
Source: Hindawi journal article supplement (doi:10.1155/2019/1786373), 2019-04-08
Supplement: f1 [file 1786373.f1.zip]

Archive with 36 entries (33 files):
- 1786373.f1/
- 1786373.f1/Left-turn/
- 1786373.f1/Left-turn/Dalian Rd - Kongjiang Rd.xlsx
- 1786373.f1/Left-turn/Dalian Rd - Zhoujiazui Rd.xlsx
- 1786373.f1/Left-turn/Dongfang Rd - Lancun Rd.xlsx
- 1786373.f1/Left-turn/Haining Rd - Wusong Rd.xlsx
- 1786373.f1/Left-turn/Henan Rd - Fuxing Rd.xlsx
- 1786373.f1/Left-turn/Huangpi Rd - Yanan Rd.xlsx
- 1786373.f1/Left-turn/Jiangpu Rd - Kongjiang Rd.xlsx
- 1786373.f1/Left-turn/Siping Rd- Zhongshanbeier Rd.xlsx
- 1786373.f1/Left-turn/Songhu Rd - Zhayin Rd.xlsx
- 1786373.f1/Left-turn/Songhuajiang Rd - Yingkou Rd.xlsx
- 1786373.f1/Left-turn/Wenshui Rd - Quyang Rd.xlsx
- 1786373.f1/Left-turn/Xujiahui Rd - Luban Rd.xlsx
- 1786373.f1/Left-turn/Zhoujiazui Rd - Dalian Rd.xlsx
- 1786373.f1/Left-turn/Zhoujiazui Rd - Huangxing Rd.xlsx
- 1786373.f1/Left-turn/Zhoujiazui Rd - Longchang Rd.xlsx
- 1786373.f1/Through movement/
- 1786373.f1/Through movement/Changyang Rd - Linqing Rd.xlsx
- 1786373.f1/Through movement/Guoshun Rd - Huangxing Rd.xlsx
- 1786373.f1/Through movement/Guoshun Rd - Yingkou Rd.xlsx
- 1786373.f1/Through movement/Haining Rd - Zhoujiazui Rd.xlsx
- 1786373.f1/Through movement/Henan Rd - Beijing Rd.xlsx
- 1786373.f1/Through movement/Henan Rd - Yanan Rd.xlsx
- 1786373.f1/Through movement/Jiangpu Rd - Kunming Rd.xlsx
- 1786373.f1/Through movement/Jinhai Rd - Jinke Rd.xlsx
- 1786373.f1/Through movement/Jinke Rd - Zuchongzhi Rd.xlsx
- 1786373.f1/Through movement/Jungong Rd - Changyang Rd(with intersection guide line).xlsx
- 1786373.f1/Through movement/Jungong Rd - Changyang Rd.xlsx
- 1786373.f1/Through movement/Jungong Rd - Xiangying Rd.xlsx
- 1786373.f1/Through movement/Linshan Rd - Nanyangjing Rd.xlsx
- 1786373.f1/Through movement/Songhuajiang Rd - Yingkou Rd.xlsx
- 1786373.f1/Through movement/Zhongshandongyi Rd - Yanan Rd.xlsx
- 1786373.f1/Through movement/Zhoujiazui Rd - Dalian Rd.xlsx
- 1786373.f1/Through movement/Zhoujiazui Rd - Huangxing Rd.xlsx
- 1786373.f1/Through movement/Zhoujiazui Rd - Longchang Rd.xlsx
