# Supplementary material for: Impact of Guideline Markings on Saturation Flow Rate at Signalized Intersections
Source: Hindawi journal article supplement (doi:10.1155/2019/1786373), 2019-04-08
Supplement: f1 [file 1786373.f1.zip › 1786373.f1/Left-turn/Dalian Rd - Kongjiang Rd.xlsx]

## Sheet: Dalian Rd - Kongjiang Rd
Headway	Cycle number
1.62	1
1.85	1
1.84	1
2.63	1
3.46	1
2.07	1
2.34	1
1.85	1
1.86	1
1.94	1
2.93	1
1.86	1
1.26	1
1.65	1
1.58	1
1.97	1
2.6	1
2.09	1
2.17	1
1.86	1
1.19	1
1.71	1
3.32	1
2.22	1
3.94	1
3.59	1
2.35	1
3	1
3.74	1
2.99	1
2.15	2
1.98	2
2.25	2
1.44	2
2.11	2
2.41	2
2.57	2
2.27	2
2.25	2
1.66	2
1.63	2
2.1	2
1.83	2
1.6	2
2.57	2
1.86	2
1.84	2
1.59	2
1.89	2
2.03	2
2.04	2
1.78	2
2.58	2
1.48	2
2.53	2
2.74	2
2.45	2
2.75	2
3.97	2
2.06	2
2.33	2
2.42	2
1.56	2
1.97	2
2.51	2
1.83	2
2.81	2
2.81	2
2.37	2
2.51	2
1.16	2
1.35	2
2.6	2
2.87	2
3.47	2
1.8	2
2.52	2
1.43	2
3.25	2
2.01	2
3.73	2
1.88	2
2.24	2
1.93	2
2.1	2
2.51	2
3.28	2
2.54	2
2.33	2
2.06	3
2.49	3
2.06	3
1.62	3
2.04	3
1.9	3
1.93	3
2.27	3
2.11	3
2.31	3
1.52	3
1.84	3
1.41	3
1.67	3
1.93	3
1.97	3
1.92	3
1.65	3
1.55	3
3.02	3
1.46	3
2.16	3
1.48	3
2.52	3
2.83	3
1.08	3
1.44	3
2.07	3
1.58	3
2.99	3
1.75	3
2.01	3
2.25	3
4.81	3
2.53	3
1.88	3
3	3
2.49	3
2.1	3
2.89	3
2.89	3
2.04	3
2.71	3
2.43	3
4.31	3
2.67	3
2.51	3
4.24	3
1.41	3
1.82	3
1.61	3
2.7	3
3.13	3
2.21	3
1.91	3
1.66	3
2.04	3
3.67	3
1.62	3
1.95	3
1.94	3
1.98	3
1.75	3
1.41	3
2.91	3
1.48	3
2.37	3
2.7	3
2.28	3
2.3	3
1.65	3
2.72	3
4.23	3
2.82	3
1.72	3
2.88	3
2.35	3
2.43	3
2.3	3
2.2	3
2.66	3
3.24	3
2.78	3
2.66	3
2.39	4
2.24	4
2.05	4
2.13	4
2.92	4
2.83	4
1.52	4
1.81	4
2.67	4
2.92	4
1.8	4
1.9	4
2.57	4
2.35	4
2.36	4
1.94	4
2.39	4
1.43	4
2.19	4
2.07	4
1.31	4
1.47	4
1.86	4
1.9	4
1.08	4
1.37	4
2	4
2.28	4
1.99	4
4.59	4
2.44	4
2.78	4
1.67	4
1.51	4
2.52	4
1.65	4
1.87	4
1.91	4
3.88	4
2.45	4
3.17	4
1.95	4
3.92	4
4.27	4
3.22	4
1.65	4
3.34	4
2.67	4
3.33	4
2.14	4
1.89	4
3.09	4
2.03	4
1.2	4
3.09	4
1.47	5
4.48	5
2.46	5
2.9	5
1.37	5
1.46	5
1.44	5
1.3	5
1.32	5
1.76	5
2.57	5
1.79	5
2.04	5
2.09	5
2.13	5
1.47	5
2.32	5
2.08	5
1.92	5
2.04	5
2.19	5
1.5	5
2.45	5
2.17	5
2.54	5
2.3	5
2.58	5
2.53	5
1.92	5
1.75	5
3.52	5
2.42	5
2.56	5
1.46	5
2.55	5
1.73	5
1.78	5
5.03	5
2.35	5
1.73	5
2.34	5
2.39	5
1.67	5
3.33	5
2.3	5
2.23	6
2.13	6
3.85	6
1.67	6
2.49	6
1.16	6
1.43	6
2.06	6
3.61	6
1.61	6
4.38	6
1.94	6
1.71	6
2.18	6
2.48	6
2.08	6
2.37	6
1.65	6
1.78	6
1.8	6
3.27	6
2.51	6
2.17	6
2.87	6
3.39	6
1.32	6
2.7	6
1.75	6
1.6	6
1.55	6
2.44	6
2.59	6
3.17	6
1.99	6
2.89	6
3.35	6
1.11	6
4.44	6
2.27	6
1.75	6
3.33	6
1.94	6
2.5	6
3.26	6
1.9	7
1.99	7
1.98	7
1.98	7
2.29	7
3.11	7
1.89	7
2.17	7
1.93	7
2.07	7
1.96	7
1.93	7
3.61	7
3.65	7
1.94	7
2.49	7
2	7
1.97	7
2.33	7
2.6	7
2.95	7
2.4	7
2.11	7
1.46	7
2.25	7
1.3	7
2.58	7
2.28	7
4.01	7
3.85	7
2.05	7
3.64	7
1.97	7
2.82	7
4.83	7
2.51	7
1.75	7
2.37	7
2.36	7
2.25	7
2.58	7
2.71	7
2.31	8
3.98	8
1.6	8
1.46	8
1.65	8
1.25	8
2.68	8
3.96	8
2.54	8
2.51	8
2.49	8
2.25	8
4.01	8
1.17	8
1.89	8
1.71	8
1.81	8
1.36	8
1.15	8
4.6	8
1.25	8
1.75	8
1.82	8
2.03	8
1.28	8
2.61	8
2.22	8
2.11	8
3.49	8
4.51	8
1.62	8
2.38	8
3.1	8
2.17	8
2.13	8
4.22	8
1.83	8
2.69	8
1.96	8
3.15	8
3.41	8
2.52	8
1.53	8
2.43	8
2.41	8
2.03	8
3.44	8
2.63	8
1.27	9
1.8	9
2.36	9
3.38	9
2.42	9
2.85	9
1.81	9
1.82	9
3.69	9
1.98	9
3.02	9
2.56	9
2.46	9
2.47	9
1.09	9
1.42	9
2.09	9
1.58	9
2.66	9
1.56	9
1.37	9
3.66	9
2.82	9
1.87	9
2.82	9
2.63	9
2.7	9
2.08	9
1.44	9
1.78	9
2.39	9
1.95	9
1.79	9
1.85	9
2.3	9
1.31	9
2.19	9
2.17	9
1.7	9
2.85	9
2.43	9
1.34	9
5.05	9
2.8	9
4.44	9
2.79	9
2.52	9
2.52	9
2.29	9
3.14	9
3.58	9
3.28	10
1.91	10
3.66	10
2.91	10
2.65	10
1.9	10
2.66	10
2.84	10
3.7	10
2.67	10
3.43	10
4.99	10
1.39	10
4.39	10
1.62	10
1.91	10
2.91	10
2.18	10
3.34	10
3.52	10
3.44	10
2.05	10
1.95	10
2.42	10
3.43	10
1.94	10
3.99	10
2.09	10
2.89	10
4.62	10
1.82	10
1.45	10
1.9	10
3.08	10
3.76	10
1.57	10
3.29	10
1.81	10
4.31	10
3.08	10
2.86	10
3.46	11
2.46	11
3.68	11
1.9	11
1.9	11
1.97	11
1.31	11
1.47	11
1.97	11
1.72	11
3.16	11
3.43	11
2.01	11
3.25	11
2.54	11
2.42	11
4.01	11
1.61	11
2.36	11
3.28	11
1.57	11
5.19	11
2.5	11
1.83	11
2.29	11
4.68	11
1.44	11
3.09	11
3.42	11
4.76	11
2.52	11
2.35	11
2.98	11
2.22	11
2.69	11
2.88	11
2.19	12
1.34	12
3.83	12
2.49	12
1.35	12
4.2	12
4.79	12
2.1	12
2.09	12
2.75	12
3.96	12
1.74	12
1.79	12
1.72	12
2.37	12
1.87	12
3.2	12
1.36	12
1.9	12
2.29	12
1.73	12
2.61	12
2.3	12
2.43	12
3.09	12
1.83	12
1.97	12
1.51	12
2.09	12
2.01	12
3.17	12
1.99	12
3.98	12
4.8	12
2.39311
