# Supplementary material for: Impact of Guideline Markings on Saturation Flow Rate at Signalized Intersections
Source: Hindawi journal article supplement (doi:10.1155/2019/1786373), 2019-04-08
Supplement: f1 [file 1786373.f1.zip › 1786373.f1/Left-turn/Dalian Rd - Zhoujiazui Rd.xlsx]

## Sheet: Dalian Rd - Zhoujiazui Rd
Headway	Cycle number
2.56	2
2.55	2
1.3	2
2.25	2
2.7	2
4.44	2
3.91	2
2.65	2
3.74	2
2.41	2
3.52	2
3.43	2
2.89	2
1.81	2
4.34	2
3.57	2
4.01	2
3.08	2
3.37	2
3.53	2
2.13	3
3.74	3
3.14	3
2.99	3
2.35	3
1.8	3
2.09	3
1.75	3
2.69	3
2.48	3
2.61	3
3.36	3
2.49	3
3.11	3
1.42	3
1.77	3
2.38	3
1.41	3
2.04	3
2.38	3
2.78	3
2.07	3
1.92	3
2.88	4
2.69	4
2.87	4
2.34	4
2.91	4
3.1	4
3.35	4
4.21	4
2.77	4
3.37	4
4.09	4
3.82	4
2.31	4
2.7	4
3.03	4
3.3	5
0.93	5
2.62	5
3.41	5
2.56	5
3	5
3	5
4.01	5
2.44	5
3.35	5
3.07	5
2.71	5
3.03	5
1.51	5
2.68	5
4.15	5
1.89	5
3.54	5
2.05	5
1.13	5
4.37	5
4.12	5
1.78	5
3.03	6
2.29	6
4.31	6
2.4	6
3.05	6
2.88	6
2.98	6
2.93	6
2.01	6
4.06	6
2.51	6
4.49	6
2.85	6
2.55	6
3.99	6
2.91	6
2.98	6
3.3	6
2.69	7
2.86	7
2.12	7
4.35	7
3.2	7
2.73	7
3.13	7
4.32	7
3.68	7
2.22	7
2.48	7
4.41	7
1.93	7
3.03	7
2.38	7
2.45	7
1.41	7
2.4	7
4.1	7
2.56	7
2.56	7
3.23	8
3.62	8
2.4	8
3.57	8
3.86	8
2.36	8
2.36	8
1.9	8
2.85	8
4.15	8
4.15	8
3.34	8
3.43	8
2.07	8
3.2	8
4.22	8
4.21	8
4.21	8
3.6	9
2.29	9
2.38	9
3.5	9
2.55	9
2.61	9
2.3	9
2.3	9
2.75	9
2.78	9
3.89	9
4	9
0.88	9
3.2	9
2.93	9
3.55	9
2.14	9
2.6	9
2.51	10
2.2	10
2.98	10
3.81	10
4.1	10
3.39	10
4.21	10
3.14	10
3.14	10
3.14	10
4.6	10
4.6	10
2.37	10
4.29	10
2.77	10
4.38	10
2.77	10
2.17	10
2.79	10
2.79	10
4.41	10
4.69	11
4.69	11
3.69	11
1.7	11
3.01	11
3.06	11
2.03	11
1.84	11
1.73	11
3.53	11
3.53	11
2.62	11
4.6	12
2.47	12
3.52	12
3.52	12
3.85	12
2.83	12
2.83	12
2.5	12
2.5	12
4.16	12
4.06	12
2.89	12
1.96	12
3.08	12
2.14	12
0.75	12
3.51	12
0.85	12
2.05	12
3.07	12
2.56	12
2.66	13
2.82	13
2.71	13
2.92	13
4.75	13
3.65	13
2.84	13
2.05	13
2.11	13
2.74	13
1.63	13
3.18	13
3.25	13
2.27	13
3.91	13
3.17	13
3.23	13
1.53	13
3.85	13
1.51	13
2.55	13
2.28	13
3.22	13
2.27	13
2.82	13
3.52	13
2.19	13
2.24	13
2.27	13
2.37	13
