# Supplementary material for: Impact of Guideline Markings on Saturation Flow Rate at Signalized Intersections
Source: Hindawi journal article supplement (doi:10.1155/2019/1786373), 2019-04-08
Supplement: f1 [file 1786373.f1.zip › 1786373.f1/Left-turn/Dongfang Rd - Lancun Rd.xlsx]

## Sheet: Dongfang Rd - Lancun Rd
Headway	Cycle number
4.13	1
2.24	1
2.17	1
2.58	1
2.2	1
2.01	1
1.78	2
2.47	2
2.95	2
2.39	2
2.1	3
2.2	3
2.32	3
2.31	3
2.34	3
1.75	4
1.73	4
2.6	4
1.9	4
	4
2.69	5
2.62	5
2.69	5
3.75	5
2.51	5
	5
2.21	6
1.73	6
2.04	6
3.03	6
	6
1.81	7
2.41	7
3.2	7
2.43	7
2.45	7
	7
2.74	8
2.32	8
2.42	8
3.03	8
2.05	8
1.85	8
2.1	9
4.1	10
1.87	10
2.63	10
2.77	10
2.54	10
2.1	10
2.31	11
2.12	11
2.36	11
1.64	11
1.73	11
2.1	12
3.07	12
2.3	12
3.28	12
1.3	12
2.61	12
2.16	13
2.71	13
2.56	13
1.69	13
1.85	13
2.39	13
2.87	14
3.87	14
2.02	14
2.46	14
1.99	15
2.85	15
2.64	15
2.07	15
2.57	15
2.51	15
1.61	15
2.32	16
2.43	16
2.3	16
2.09	16
2.04	16
