# Supplementary material for: Impact of Guideline Markings on Saturation Flow Rate at Signalized Intersections
Source: Hindawi journal article supplement (doi:10.1155/2019/1786373), 2019-04-08
Supplement: f1 [file 1786373.f1.zip › 1786373.f1/Left-turn/Haining Rd - Wusong Rd.xlsx]

## Sheet: Haining Rd - Wusong Rd
Headway	Cycle number
1.48	1
2.13	1
2.18	1
1.8	1
1.5	1
2.84	1
2.25	1
3.17	1
2.9	1
2.42	1
1.99	1
1.74	1
1.71	1
1.64	1
2.01	1
1.9	1
2.29	1
2.38	1
4.01	1
1.77	1
1.87	1
1.67	1
1.81	1
3.33	1
3.2	1
2.24	1
1.65	1
3.06	1
1.86	1
4.28	1
2.64	1
2.14	1
1.77	2
2.1	2
1.86	2
2.67	2
2.17	2
1.67	2
2.34	2
2.65	2
2.05	2
3.67	2
1.4	2
1.87	2
2.15	2
2.03	2
1.42	2
2.21	2
2.16	2
2.05	2
3.52	2
2.14	2
2.86	2
2.1	2
1.81	2
1.7	2
1.6	2
4.47	2
1.63	2
2.71	2
1.71	2
2.55	2
1.52	2
2.06	2
2.29	2
3.53	2
2.55	2
2.18	2
1.65	2
3.29	2
3.49	2
1.88	2
1.68	2
2.67	3
2.1	3
2.14	3
2.05	3
2.15	3
1.52	3
2.11	3
1.83	3
1.76	3
2.71	3
2	3
2.07	3
3.01	3
2.85	3
2.55	3
2.68	3
2.13	3
2.35	3
4.81	3
1.94	3
1.85	3
1.55	3
2.18	3
2.46	3
1.41	3
2.21	3
2.2	3
1.42	3
2.17	3
2.07	3
2.74	3
2.61	3
1.82	3
2.19	3
3.64	3
3.29	4
1.7	4
1.45	4
1.47	4
2.04	4
3.48	4
1.75	4
2.95	4
2.37	4
1.73	4
1.91	4
4.11	4
2.07	4
2.84	4
2.12	4
3.97	4
2.1	4
1.98	4
2.46	4
2.27	4
2.03	4
1.35	4
1.91	4
1.77	4
2.12	4
1.58	4
1.98	4
2.77	4
1.88	4
3.5	4
2.42	4
4.83	5
3.19	5
1.68	5
1.91	5
2.9	5
2.97	5
2.73	5
1.77	5
1.47	5
1.91	5
2.01	5
2.04	5
2.49	5
1.95	5
2.75	5
1.55	5
2.47	5
3.06	5
1.36	5
2.85	5
3.07	5
3.43	5
2.64	5
2.55	5
1.95	5
2.33	5
1.54	5
2.28	5
2.12	5
1.86	5
3.47	5
2.11	5
2.3	5
2.25	5
3.55	5
2.96	5
2.8	5
2.32	5
1.85	5
2.73	5
3.43	5
2.93	5
2.23	6
2.17	6
2.84	6
2.63	6
1.25	6
4.01	6
2.71	6
2.86	6
1.87	6
1.93	6
2.66	6
1.87	6
2.16	6
4.99	6
4.2	6
3.19	6
1.78	6
2.99	6
2.23	6
1.6	6
2.53	6
2.35	6
1.95	6
2.44	6
1.95	6
2.15	6
2.2	6
2.89	6
3.18	6
2.68	6
2.16	6
1.65	7
3.39	7
2.22	7
3.93	7
2.74	7
1.73	7
3.15	7
2.71	7
2.22	7
4	7
2.49	7
2.16	7
1.75	7
4.19	7
3.91	7
2.33	7
2.49	7
1.85	7
2.36	7
3.24	7
1.39	7
2.47	7
2.14	7
3.06	7
3.12	7
2.19	7
2.5	7
2.54	7
1.28	7
2.38	7
2.46	7
1.79	7
1.67	7
2.4	7
2.09	7
3.25	7
2.81	7
2.82	7
3.24	7
2.39625
