# Supplementary material for: Impact of Guideline Markings on Saturation Flow Rate at Signalized Intersections
Source: Hindawi journal article supplement (doi:10.1155/2019/1786373), 2019-04-08
Supplement: f1 [file 1786373.f1.zip › 1786373.f1/Left-turn/Henan Rd - Fuxing Rd.xlsx]

## Sheet: Henan Rd - Fuxing Rd
Headway	Cycle number
2.7	1
	1
2.29	1
2.27	1
	1
	1
2.89	1
3.83	1
2.14	1
3.91	1
1.59	1
2.24	1
2.82	1
	1
4.8	1
3.41	1
2.2	2
2.46	2
1.9	2
1.95	2
1.99	2
4.15	2
2.46	2
3.22	2
2.61	2
	2
1.89	2
2.03	2
5.65	2
2.11	2
	2
2.3	2
3.8	2
4.3	2
	2
3.1	3
2.43	3
3.92	3
1.87	3
2.29	3
2.09	3
4.1	3
2.1	3
1.86	3
1.35	3
1.69	3
2.27	3
	3
2.74	3
1.41	3
2.77	3
2.66	3
4.2	3
1.97	3
1.7	3
2.67	3
2.16	3
1.88	3
	3
3.17	4
2.09	4
3.68	4
2.19	4
1.83	4
2.39	4
1.98	4
	4
2.87	4
2.65	4
3.51	4
1.82	4
2.07	4
4.12	4
2.55	4
	4
	4
	4
3.64	4
3.77	4
2.22	4
6.74	4
3.04	4
2.93	4
2.02	5
3.06	5
4.3	5
3.03	5
3.33	5
2.82	5
2.26	5
2.47	6
4.9	6
3.36	6
2.92	6
2.68	6
2.27	6
3.42	6
2.15	6
3.41	6
2.3	6
4.93	6
2.54	6
4.41	6
2.07	6
2.6	6
2.19	6
2.37	6
2.22	6
2.09	6
2.64	6
3.48	6
2.56	7
2.55	7
4.3	7
2.25	7
2.7	7
4.44	7
3.91	7
2.65	7
3.74	7
2.41	7
2.52	7
3.43	7
2.89	7
3.81	7
4.34	7
3.57	7
5.01	7
3.08	7
3.37	7
2.53	7
3.37	7
4.09	8
3.82	8
2.31	8
2.7	8
3.03	8
3.3	8
2.93	8
2.62	8
3.41	8
2.56	8
3.3	8
3.5	8
4.01	8
2.44	8
3.35	8
2.07	8
2.71	8
3.03	8
3.51	8
2.68	8
4.15	8
2.89	8
3.54	8
2.05	8
4.37	8
4.12	8
