# Supplementary material for: Impact of Guideline Markings on Saturation Flow Rate at Signalized Intersections
Source: Hindawi journal article supplement (doi:10.1155/2019/1786373), 2019-04-08
Supplement: f1 [file 1786373.f1.zip › 1786373.f1/Left-turn/Huangpi Rd - Yanan Rd.xlsx]

## Sheet: Huangpi Rd - Yanan Rd
Headway	Cycle number
1.22	1
2.27	1
1.56	1
2.7	1
1.83	1
1.71	1
2.18	1
2.1	1
1.83	1
1.79	1
2.24	1
1.84	1
1.63	1
2.49	2
2.3	2
1.37	2
2.18	2
2.5	2
3.42	2
4.13	2
2.95	2
2.5	2
2.29	3
2.34	3
2.6	3
4.55	3
2.85	3
2.05	3
2	3
1.56	3
1.87	3
2.61	3
2.55	3
2.39	3
2.37	3
3.57	3
1.45	4
1.96	4
1.93	4
1.37	4
3.02	4
2.34	4
2.11	4
2.91	4
2.36	4
2.19	4
2.68	4
2.41	4
2.79	5
1.64	5
2.25	5
2.38	5
2.65	5
2.33	5
1.94	5
2.25	5
1.82	5
2.49	5
1.56	5
1.9	5
1.98	5
2.27	5
3.63	5
2.47	5
3.02	5
1.81	5
2.26	6
2.04	6
2.13	6
2.92	6
3.08	6
2.34	6
2.07	6
2.46	6
1.84	6
2.07	6
2.14	6
2.54	6
2.59	6
2.83	6
2.49	6
2.04	7
1.76	7
2.47	7
2.39	7
3.41	7
2.7	7
3.9	7
2.53	7
1.54	7
3.46	7
2.17	7
3.8	7
3.47	7
