# Supplementary material for: Impact of Guideline Markings on Saturation Flow Rate at Signalized Intersections
Source: Hindawi journal article supplement (doi:10.1155/2019/1786373), 2019-04-08
Supplement: f1 [file 1786373.f1.zip › 1786373.f1/Left-turn/Jiangpu Rd - Kongjiang Rd.xlsx]

## Sheet: Jiangpu Rd - Kongjiang Rd
Headway	Cycle number
2.21	1
1.97	1
2.24	1
1.33	1
2.19	1
2.34	1
2.68	1
2.06	1
2.31	1
1.62	1
1.6	1
2.21	1
1.72	1
1.72	1
2.33	1
2.22	1
1.7	1
1.63	1
1.89	1
1.97	1
2.09	1
1.86	1
2.46	1
1.44	1
2.73	1
2.68	1
2.27	1
2.82	1
4.11	1
2.51	1
2.03	1
2.32	1
1.85	1
1.45	1
2.48	1
1.91	1
1.92	1
2.62	1
2.14	1
5	1
3.26	1
2.49	1
3.64	1
4.15	1
3.61	1
3.79	1
2.49	2
1.48	2
3.44	2
2.31	2
2.42	2
2.6	2
2.93	2
2.09	2
2.62	2
2.52	2
3.39	2
2.97	2
4.67	2
3.04	2
2.08	2
2.11	2
2.28	2
2.38	2
2.33	2
1.78	2
2.04	2
3.25	2
1.43	3
2.3	3
2.16	3
1.96	3
2.11	3
2.03	3
1.69	3
2.33	3
2.18	3
2.71	3
2.14	3
2.69	3
2.57	3
2.09	3
1.65	3
3.33	3
2.26	3
3.04	3
3.98	3
2.16	3
2.36	3
2.96	3
3.31	3
2.41	3
3.18	3
2.85	3
3.02	3
2.66	3
3.26	3
2.3	4
2.66	4
1.67	4
1.74	4
1.57	4
2.53	4
2.66	4
2.81	4
2.26	4
3	4
3.2	4
2.07	4
4.31	4
2.14	4
1.23	4
2.55	4
3.3	4
2.03	4
3.42	4
3	4
2.03	5
2.01	5
1.95	5
2.04	5
2.22	5
3.23	5
1.93	5
1.97	5
1.96	5
2.26	5
1.76	5
2.25	5
3.5	5
3.47	5
1.88	5
2.57	5
1.94	5
2.07	5
2.16	5
2.69	5
3.76	5
1.43	5
4.29	5
1.47	5
1.99	5
3.35	5
3.38	5
2.36	5
2.13	5
2.32	5
3.66	5
2.27	5
3.75	5
2.07	5
3.02	5
2.13	5
2.71	5
3.42	5
1.31	6
1.67	6
1.81	6
2.07	6
1.37	6
2.54	6
2.24	6
2.22	6
3.31	6
3.31	6
1.8	6
4.34	6
4.78	6
1.51	6
2.84	6
2.61	6
3.89	6
3.48	6
3.42	6
1.6	6
1.91	7
2.77	7
3.3	7
1.98	7
3.49	7
1.99	7
2.24	7
3.25	7
2.64	7
4.06	7
3.97	7
3.12	7
2.44	7
3.45	7
2.82	7
1.41	8
4.37	8
1.56	8
1.95	8
2.99	8
2.12	8
3.52	8
3.58	8
3.2	8
2.92	8
2.02	8
2.32	8
2.87	8
2.52	8
4.47	8
3.55	8
2.91	8
2.74	8
4.4	8
3.46	9
3.64	9
3.48	9
3.27	9
3.09	9
3.13	9
2.62	9
4.18	10
2.66	10
2.39	10
2.95	10
3.31	10
4.11	10
2.76	10
2.68	11
2.46	11
1.72	11
2.05	11
1.91	11
2.81	11
2.54	11
2.97	11
3.53	11
3.45	11
3.2	11
2.19	12
2.99	12
2.98	12
3.22	12
2.83	12
3.12	12
2.74	13
3.63	13
1.42	13
2.78	13
3.95	13
3.46	13
3.04	13
2.66	13
2.22	13
2.31	13
3.57	13
2.39	13
2.62817
