# Supplementary material for: Impact of Guideline Markings on Saturation Flow Rate at Signalized Intersections
Source: Hindawi journal article supplement (doi:10.1155/2019/1786373), 2019-04-08
Supplement: f1 [file 1786373.f1.zip › 1786373.f1/Left-turn/Siping Rd- Zhongshanbeier Rd.xlsx]

## Sheet: Siping Rd- Zhongshanbeier Rd
Headway	Cycle number
1.72	1
2.42	1
3.63	1
2.21	1
2.72	1
2.45	1
3.72	2
1.47	2
3.54	2
4.18	2
2.99	2
3.95	2
2.07	2
2.21	2
3.74	2
3.7	2
3.25	2
2.66	2
2.77	2
2.53	2
2.48	2
3.89	2
2.27	2
2.97	2
2.29	2
2.08	2
2.37	2
1.81	3
2.07	3
2.3	3
2.03	3
2.17	3
2.55	3
1.91	3
3.1	3
3.99	3
2.44	3
2.87	3
4.03	3
2.11	3
2.72	3
2.03	3
1.1	3
0.84	3
3.72	3
2.2	3
1.9	3
2.54	3
2.85	3
2.76	3
3.69	3
2.9	4
1.79	4
1.18	4
2.77	4
2.33	4
2.23	4
1.04	4
4	4
1.89	4
2.67	4
3.48	4
3.1	4
4.42	4
2.97	4
1.55	4
3.55	4
2.36	4
2.82	4
2.2	4
3.02	4
3.57	4
2.26	5
1.55	5
1.89	5
1.7	5
2.53	5
1.4	5
2.78	5
2.91	5
1.8	5
2.58	5
3.87	5
1.92	5
2.51	5
1.83	5
2.84	5
4.39	5
4.32	5
1.6	5
5	5
1.59	5
2.67	5
3.01	5
3.76	5
2.13	6
2.13	6
2.5	6
2.4	6
2.87	6
2.62	6
1.86	6
1.47	6
3.9	6
3.69	6
3.51	6
5	6
1.86	6
2.77	6
1.67	6
3.03	6
2.08	6
3.26	6
2.05	6
4.07	6
3.33	6
2.02	6
3.16	6
4.12	6
1.48	7
2.54	7
1.78	7
2.26	7
2.19	7
2.16	7
2.76	7
2.13	7
2.62	7
2.96	7
3.22	7
3.43	7
1.63	7
2.58	7
2.29	7
2.48	7
1.8	7
3.44	7
2.38	7
2.05	7
3.61	7
2.63	7
3.46	7
5.05	7
2.53	8
2.26	8
1.8	8
2.15	8
5.12	8
2.11	8
2.66	8
1.91	8
2.14	8
1.93	8
1.79	8
3.2	8
1.62	8
2.38	8
2.15	8
1.84	8
1.93	8
3.17	8
1.84	8
3.35	8
1.94	8
2.22	8
3.51	8
2.71	9
2.61	9
1.85	9
2.42	9
1.76	9
3.17	9
1.15	9
4.73	9
2.32	9
3.09	9
2.45	9
2.01	9
2.56	9
2.64	9
1.74	9
3.69	9
2.18	9
4.73	9
1.18	10
4.8	10
2.59	10
2.82	10
2.65	10
2.47	10
3.2	10
3.13	10
1.9	10
3.1	10
2.99	10
0.88	10
3.94	10
2.43	10
3.65	10
2.61	10
2.47	10
2.64	10
4.25	10
2.02	10
2.94	10
3.93	10
2.66476
