# Supplementary material for: Impact of Guideline Markings on Saturation Flow Rate at Signalized Intersections
Source: Hindawi journal article supplement (doi:10.1155/2019/1786373), 2019-04-08
Supplement: f1 [file 1786373.f1.zip › 1786373.f1/Left-turn/Songhu Rd - Zhayin Rd.xlsx]

## Sheet: Songhu Rd - Zhayin Rd
Headway	Cycle number
2.48	1
2.13	1
2.18	1
2.8	1
3.5	1
2.84	1
2.25	1
3.17	1
2.9	1
2.42	1
4.99	1
2.74	1
1.71	1
1.64	1
4.01	1
3.9	1
2.29	1
2.38	1
4.01	1
4.1	1
3.68	1
2.39	1
2.54	1
1.97	1
3.96	1
1.64	1
2.13	1
3.05	1
2.69	1
3.91	1
3.03	1
2.99	1
3.77	1
1.87	1
2.67	1
3.81	1
3.33	1
3.2	1
2.24	1
1.65	1
3.06	1
1.86	1
4.28	1
2.64	1
2.14	1
2.48	1
3.79	1
2.69	1
1.61	1
2.86	1
1.97	1
2.78	1
4.48	1
1.63	1
2.37	1
2.35	1
4.14	1
2.67	1
3.99	1
4.23	1
2.92	1
2.4	1
2.29	1
2.39	1
4.06	1
3.28	1
2.54	1
2.69	1
1.77	2
4.1	2
1.86	2
2.67	2
2.17	2
1.67	2
2.34	2
2.65	2
2.05	2
3.67	2
3.42	2
2.21	2
2.16	2
2.05	2
3.52	2
2.14	2
2.86	2
2.1	2
1.95	2
2.44	2
1.43	2
4.07	2
2.48	2
2.95	2
3.7	2
3.6	2
4.47	2
1.63	2
2.71	2
1.71	2
2.55	2
1.52	2
2.06	2
2.29	2
3.53	2
2.55	2
2.18	2
1.65	2
3.29	2
3.49	2
1.88	2
3.68	2
1.8	2
5.14	2
1.58	2
2.47	2
2.37	2
2.3	2
2.41	2
2.1	2
2.12	2
2.78	2
4.28	2
3.19	2
2.94	2
2.41	2
1.91	2
1.85	2
2.93	2
2.79	2
2.63	2
3.39	2
3.37	2
2.27	2
2.64	2
2.26	2
3.37	2
2.67	3
2.1	3
2.14	3
2.05	3
2.15	3
3.52	3
2.11	3
2.83	3
1.76	3
2.71	3
3.2	3
2.07	3
3.01	3
2.85	3
2.55	3
2.68	3
2.13	3
2.35	3
2.99	3
3.46	3
1.46	3
4.35	3
1.69	3
2.46	3
1.81	3
2.33	3
2.13	3
1.88	3
2.15	3
3.61	3
2.31	3
4.15	3
3.27	3
3.94	3
1.85	3
2.55	3
2.18	3
2.46	3
2.41	3
2.21	3
2.2	3
3.42	3
2.17	3
2.07	3
2.74	3
2.61	3
1.82	3
2.19	3
3.64	3
2.92	3
2.82	3
5.32	3
2.01	3
3.03	3
2.56	3
1.75	3
2.18	3
3.5	3
3.88	3
3.33	3
2.63	3
2.39	3
4.02	3
2.15	3
4.2	3
2.18	3
2.45	3
3.82	3
3.01	3
3.63	3
2.76	3
2.78	3
3.4	3
2.14	3
2.18	3
2.6	3
2.98	3
2.8	3
3.16	3
3.29	4
1.7	4
2.45	4
1.47	4
2.04	4
3.48	4
1.75	4
2.95	4
2.37	4
1.73	4
1.91	4
4.11	4
2.07	4
2.84	4
1.96	4
2.73	4
2.36	4
3.29	4
4.19	4
2.41	4
3.14	4
2.29	4
2.26	4
5.24	4
3.6	4
2.27	4
2.1	4
2.57	4
1.96	4
2.12	4
3.97	4
2.1	4
1.98	4
2.46	4
5.12	4
2.27	4
2.03	4
1.35	4
1.91	4
1.77	4
2.12	4
1.58	4
1.98	4
2.77	4
4.93	4
1.88	4
3.5	4
2.42	4
2.42	4
2.76	4
2.17	4
4.26	4
3.68	4
4.13	4
3.48	4
2.58	4
2.07	4
3.07	4
4.16	4
2.47	4
3.05	4
4.83	5
3.19	5
1.68	5
2.91	5
2.9	5
2.97	5
1.73	5
2.77	5
2.47	5
1.91	5
2.01	5
4.04	5
2.49	5
1.95	5
2.75	5
1.55	5
2.47	5
3.06	5
1.36	5
2.85	5
3.07	5
2.6	5
2.29	5
1.71	5
1.84	5
2.46	5
3.23	5
2.27	5
2.32	5
2.78	5
3.43	5
1.64	5
2.55	5
1.95	5
2.33	5
1.54	5
2.28	5
2.12	5
1.86	5
2.47	5
2.11	5
2.3	5
2.25	5
3.55	5
2.96	5
2.8	5
2.32	5
2.85	5
1.73	5
3.43	5
1.93	5
4.7	5
2.24	5
3.37	5
1.79	5
2.53	5
1.46	5
3.63	5
2.44	5
4.1	5
2.39	5
3.99	5
2.86	5
2.25	5
3.7	5
2.57	5
2.23	6
2.17	6
2.84	6
2.63	6
2.25	6
6.86	6
2.01	6
3.71	6
2.86	6
2.87	6
2.93	6
2.66	6
2.87	6
2.16	6
4.99	6
4.2	6
5.26	6
2.95	6
2.04	6
2.08	6
3.97	6
2.23	6
2.17	6
4.82	6
2.06	6
2.86	6
2.77	6
3.28	6
3.19	6
1.78	6
1.99	6
2.23	6
4.6	6
2.53	6
2.35	6
1.95	6
2.44	6
1.95	6
2.15	6
2.2	6
2.89	6
3.18	6
2.68	6
2.16	6
4.49	6
2.1	6
4.95	6
2.31	6
4.96	6
2.82	6
3.92	6
3.98	6
2.57	6
2.25	6
2.72	6
2.47	6
4.02	6
4.37	6
3.04	6
3.86	6
1.65	7
3.39	7
2.22	7
3.93	7
2.74	7
1.73	7
3.15	7
2.71	7
2.22	7
2.4	7
2.49	7
2.16	7
2.75	7
2.19	7
3.91	7
2.36	7
3.24	7
3.44	7
1.91	7
3.23	7
3.36	7
3.4	7
3.85	7
1.39	7
3.47	7
2.14	7
3.06	7
2.12	7
2.19	7
2.5	7
1.54	7
1.28	7
2.38	7
2.46	7
2.79	7
3.67	7
3.4	7
2.09	7
3.25	7
2.81	7
2.82	7
5.11	7
3.24	7
1.94	7
4.73	7
2.44	7
3.7	7
2.6	7
4.7	7
2.63	7
2.52	7
3.61	7
5.19	7
3.91	7
3.97	7
2.72	7
2.81	7
2.39	7
2.64	7
2.05	7
2.64	8
1.98	8
4.1	8
2.8	8
2.33	8
1.78	8
2.64	8
3.79	8
2.49	8
1.85	8
2.66	8
3.54	8
3.5	8
2.38	8
2.43	8
2.6	8
1.74	8
2.75	8
1.68	8
2.57	8
3.51	8
3.58	8
1.97	8
2.41	8
5.2	8
3.18	8
2.76	8
3.92	8
3.16	8
3.99	9
1.88	9
2.73	9
2.46	9
2.7	9
2.28	9
1.75	9
1.87	9
2.47	9
2.74	9
3.26	9
3.23	9
2.33	9
3.91	9
2.81	9
2.43	9
2.99	9
2.16	9
3.93	9
3.14	9
2.83	9
2.75	9
2.63	9
4.54	9
3.74	9
4.22	10
2.52	10
2.51	10
1.92	10
2.12	10
1.61	10
4.66	10
2.72	10
2.05	10
2.99	10
2.33	10
3.03	10
1.94	10
2.46	10
2.91	10
2.82	10
4.3	10
3.48	10
2.96	10
2.91	10
4.09	10
1.88	10
1.75	10
5.07	10
4.2	10
3.28	10
3.69	10
2.57	10
1.77	11
1.75	11
1.62	11
2.08	11
3.73	11
3.17	11
2.85	11
3.09	11
2.83	11
4.46	11
1.93	11
2.78	11
3.75	11
2.08	11
4.63	11
3.33	11
2.51	11
2.12	11
2.32	11
3.56	11
2.61	11
2.98	11
2.37	11
2.29	11
2.28	11
2.08	11
2.99	11
2.51	11
2.35	11
4.63	11
2.1	12
2.64	12
2.45	12
2.75	12
2.74	12
2.08	12
3.1	12
1.95	12
1.98	12
2.61	12
5.2	12
2.63	12
1.86	13
2.58	13
4.49	13
4.36	13
2.63	13
2.06	13
3.87	13
2.79	13
3.96	13
2.76	13
2.82	13
4.09	13
2.84	13
2.22	13
3.66	13
2.22	13
3.1	13
3.01	13
3.1	13
2.82	13
2.73	13
2.86	13
2.88	13
2.44	13
2.69	13
2.35	13
3.27	13
2.88	13
2.71	14
2.64	14
2.16	14
3.4	14
2.95	14
1.68	14
2.36	14
2.58	14
2.3	14
3.7	14
3.93	14
2.34	14
3.97	14
3.2	14
2.09	14
2.01	14
2.55	14
2.16	14
4.47	14
3.49	14
3.29	14
5.08	14
2.04	14
3.65	14
4.3	14
3.95	14
2.13	14
2.57	14
2.56	14
2.77	14
3.45	14
3.48	14
2.89	15
2.81	15
4.07	15
4.61	15
2.89	15
2.81	15
2.39	15
2.89	15
2.75	15
3.64	15
3.41	15
2.14	15
3.35	15
3.48	15
4.04	15
2.35	15
4.17	15
3.32	15
4.87	15
2.66	15
2.21	15
2.98	15
3.05	15
3.47	15
3.15	15
3.08	15
