# Supplementary material for: Impact of Guideline Markings on Saturation Flow Rate at Signalized Intersections
Source: Hindawi journal article supplement (doi:10.1155/2019/1786373), 2019-04-08
Supplement: f1 [file 1786373.f1.zip › 1786373.f1/Left-turn/Songhuajiang Rd - Yingkou Rd.xlsx]

## Sheet: Songhuajiang Rd - Yingkou Rd
Headway	Cycle number
2.27	1
2.93	1
2.35	1
4.42	1
2.45	1
2.67	1
2.24	1
2.93	1
3.75	2
2.8	2
3.36	2
2.09	2
2.45	2
3.39	3
4.25	3
3.39	3
2.88	3
2.27	3
2.53	3
4.1	3
2.35	4
2.19	4
4.47	4
1.92	4
2.83	4
2.7	4
2.53	4
3.34	4
2.14	5
3.59	5
2.56	5
1.96	5
2.12	5
2.45	5
2.87	5
2.41	5
2.28	5
4.07	5
3.69	6
2.35	6
2.56	6
1.85	6
2.05	6
2.61	6
2.13	6
2.9	6
3.71	7
1.85	7
4.87	7
3.63	7
2.9	7
2.43	7
4.81	7
2.39	8
2.45	8
1.97	8
3.61	8
2.22	8
2.84	8
4.7	8
2.31	8
1.75	8
2.79	9
3.74	9
5.19	9
2.74	9
1.99	9
2.15	9
3.27	9
2.09	9
4.2	9
2.9	10
2.71	10
2.52	10
2.79	10
4.52	10
2.35	10
5.13	10
3.22	11
4.01	11
2.81	11
1.95	11
2.38	11
2.31	12
1.83	12
2.49	12
2.42	12
2.64	12
4.68	12
2.31	12
1.77	13
2.18	13
1.88	13
2.9	13
2.37	13
2.35	13
2.24	14
2.89	14
2.74	14
1.87	14
2.01	14
2.32	15
1.06	15
1.94	15
2.23	15
3.47	15
1.75	15
1.97	16
2.1	16
1.63	16
3.99	16
3.2	16
2.76	17
3.01	17
1.99	17
4.03	17
2.69	17
1.45	18
1.61	18
2.05	18
3.22	18
2.22	18
1.88	18
1.51	18
3.05	18
2.66	18
1.74	19
3.91	19
3.09	19
1.93	19
2.79	19
2.24	19
2.51	19
