# Supplementary material for: Impact of Guideline Markings on Saturation Flow Rate at Signalized Intersections
Source: Hindawi journal article supplement (doi:10.1155/2019/1786373), 2019-04-08
Supplement: f1 [file 1786373.f1.zip › 1786373.f1/Left-turn/Wenshui Rd - Quyang Rd.xlsx]

## Sheet: Wenshui Rd - Quyang Rd
Headway	Cycle number
2.37	1
2.96	1
2.35	1
1.96	1
2.18	1
4.75	1
2.46	1
2.49	1
2.34	1
2.26	2
2.38	2
2.04	2
1.8	2
1.21	2
2.08	2
2.45	2
2.29	2
4.07	2
3.16	2
1.82	2
4.4	2
2.42	2
2.08	2
3.4	2
2.31	2
2.66	3
2.55	3
2.86	3
2.89	3
1.85	3
1.92	3
2.39	3
2.85	3
1.78	3
2.24	3
2.67	3
2.23	3
2.28	3
2.86	3
2.62	3
3.8	3
4.32	4
3.45	4
1.69	4
1.63	4
3.44	4
3.34	4
2.5	4
4.26	4
2.3	4
3.87	4
2.11	4
2.79	4
2.14	5
1.31	5
2.23	5
5.11	5
2.6	5
1.92	5
2.49	5
2.92	5
3.48	5
2.28	5
2.31	5
4.35	5
3.32	5
5.51	6
1.73	6
1.93	6
2.81	6
2.76	6
3	6
5.28	7
1.63	7
2	7
3.29	7
2.01	7
1.92	7
1.78	7
3.29	7
2.79	7
4.04	7
4.73	7
2.86	7
3.21	8
2.39	8
3.84	8
3.38	8
3.7	8
2.18	8
3.63	8
3.29	8
1.3	9
2.35	9
1.11	9
2.15	9
1.73	9
1.82	9
4.34	9
2.55	9
2.49	9
2.35	9
5.43	9
2.26	9
4.51	9
2.79	9
3.93	10
1.95	10
4.25	10
2.46	10
2.33	10
3.16	10
2.86	10
3.34	10
3.23	10
2.91	10
2.03	10
2.72	10
1.47	11
1.37	11
2.94	11
1.62	11
1.99	11
4.06	11
1.73	11
2.31	11
1.45	11
3.56	11
1.48	11
2.56	11
2.4	11
2.94	11
1.72	12
3.53	12
2.57	12
3.86	12
5.2	12
1.79	12
2.93	12
2.83	12
2.37	12
2.55	12
3.22	12
2.37	12
2.63	13
2.01	13
3.18	13
1.45	13
2.42	13
2.01	13
3.04	13
2.64	13
3.13	14
4.28	14
1.74	14
3.13	14
2.24	15
3.43	15
3.03	15
2.63	15
2.14	15
1.78	15
2.36	15
3.49	15
