# Supplementary material for: Impact of Guideline Markings on Saturation Flow Rate at Signalized Intersections
Source: Hindawi journal article supplement (doi:10.1155/2019/1786373), 2019-04-08
Supplement: f1 [file 1786373.f1.zip › 1786373.f1/Left-turn/Xujiahui Rd - Luban Rd.xlsx]

## Sheet: Xujiahui Rd - Luban Rd
Headway	Cycle number
2	1
2.15	1
2.62	1
2.06	1
1.71	1
2.44	1
2.91	1
2.37	1
3.93	1
2.21	1
2.13	1
2.03	1
2.1	1
2.02	1
2.33	1
1.93	1
1.77	1
2.58	1
2.82	1
2.15	1
1.99	1
2.63	1
2.01	1
3.79	1
2.95	1
2.02	1
2.29	1
2.43	1
1.96	1
3.01	1
1.63	2
2.61	2
4.2	2
2.65	2
3.04	2
1.81	2
3.1	2
2.4	2
1.81	2
1.84	2
2.29	2
2.39	2
1.97	2
2.48	2
3.15	2
8.98	2
3.14	2
3.32	2
2.83	3
2.95	3
2.38	3
8.22	3
2.88	3
3.44	3
2.68	3
2.35	3
4.97	3
3.55	3
4.66	3
3.14	3
2.35	3
2.28	3
1.68	3
2.39	3
1.79	3
2.05	3
4.14	3
1.9	3
1.88	3
1.7	3
2.1	3
2.46	3
1.06	3
3.09	3
3.87	3
1.39	3
4.03	3
2.36	3
1.43	3
2.11	3
1.8	3
2.18	3
1.88	3
2.98	3
3.05	3
2.73	3
2.54	3
1.67	4
2.83	4
1.87	4
1.88	4
1.85	4
2.4	4
1.89	4
1.81	4
3.37	4
4.16	4
2.83	4
1.7	4
1.9	4
3.9	4
1.72	4
2.64	4
1.76	4
2.07	4
2.05	4
1.88	4
2.16	4
2.6	4
1.91	4
3.77	4
3.11	5
2.47	5
2.61	5
2.77	5
2.52	5
2.79	5
2.45	5
2.33	5
2.13	5
3.07	5
2.45	5
2.41	5
2.98	5
1.93	5
2.44	5
2.79	5
2.09	5
1.93	5
1.19	5
2.6	5
1.74	5
1.08	5
2.07	5
2.8	5
1.88	5
3.24	5
2.6	5
1.41	5
1.96	5
2.39	5
2.79	5
1.84	5
2.23	5
2.14	5
1.51	5
1.51	5
3.67	5
2.25	5
3.05	5
4.13	6
2.32	6
2.41	6
3.06	6
2.57	6
3.63	6
2.9	6
1.62	6
1.39	6
1.67	6
1.39	6
1.71	6
1.62	6
1.72	6
1.8	6
1.66	6
1.83	6
2.49	6
1.54	6
1.38	6
2.65	6
1.89	6
2.14	6
2.34	6
3.21	6
3.83	6
3.11	6
1.97	6
5.85	6
2.94	6
3.02	6
2.29	6
3.79	6
1.69	7
1.59	7
1.97	7
1.52	7
1.52	7
1.74	7
1.64	7
2.86	7
2.09	7
2	7
4.54	7
3.39	7
1.14	7
3.4	7
2.19	7
3.94	7
4.04	7
2.61	7
3.2	7
2.15	7
2.2	7
2.06	7
1.61	7
1.63	7
2.44	7
1.55	7
3.24	7
1.92	7
2.34	7
2.1	7
3.05	7
2.25	7
2.53	7
1.93	7
2.64	7
2.95	7
3.11	7
4.08	7
1.56	7
1.73	7
2.97	7
2.14	7
1.75	7
2.04	7
2.93	7
3.61	7
2.22	7
2.02	7
1.69	7
1.75	7
