# Supplementary material for: Impact of Guideline Markings on Saturation Flow Rate at Signalized Intersections
Source: Hindawi journal article supplement (doi:10.1155/2019/1786373), 2019-04-08
Supplement: f1 [file 1786373.f1.zip › 1786373.f1/Left-turn/Zhoujiazui Rd - Huangxing Rd.xlsx]

## Sheet: Zhoujiazui Rd - Huangxing Rd
Headway	Cycle number
2.14	1
2.75	1
2.12	1
2.14	1
2.64	1
1.77	1
1.95	1
1.94	1
1.4	1
4.24	1
1.39	1
1.68	1
2.73	1
2.46	1
1.79	1
3.07	1
3.62	1
1.94	1
1.13	1
1.57	1
1.75	1
2.11	1
2.62	1
2.27	1
1.86	1
2.94	1
3.19	1
1.96	1
2.81	1
2.21	1
2.04	1
1.59	1
1.94	1
2.36	1
2.51	1
1.47	1
1.47	1
7.9	1
1.6	1
1.59	1
4.3	1
2.18	1
1.69	1
1.65	1
1.83	1
1.6	1
4.51	1
1.65	1
2.61	1
2.08	1
1.9	1
2.26	1
2.15	1
1.55	1
2.57	1
1.78	1
1.83	1
2.15	1
1.4	1
1.7	1
2.14	2
2.61	2
1.55	2
1.85	2
3.42	2
2.1	2
1.56	2
1.91	2
1.73	2
2.24	2
2.37	2
1.32	2
3.89	2
2.15	2
1.71	2
1.22	2
2.02	2
1.53	2
2.13	2
2.97	2
2.01	2
2.42	2
2.7	2
2.2	2
2.07	2
1.99	2
1.55	2
1.29	2
2.44	2
1.76	2
1.48	2
4.82	2
1.82	2
1.6	2
1.99	2
2.54	2
1.66	2
2.39	2
1.77	2
1.92	2
1.03	2
2.28	2
3.61	2
3.34	2
1.74	2
2.1	2
1.86	2
2.25	2
1.7	2
1.8	2
1.68	2
2.63	2
2.16	2
1.91	2
3.93	2
4.85	2
1.49	2
1.27	2
4.21	2
2.34	2
1.87	2
2.04	2
3.5	2
1.61	3
1.61	3
1.58	3
2.13	3
2.1	3
4.36	3
5.15	3
2.3	3
2.14	3
3.54	3
2.49	3
2.4	3
1.72	3
2.25	3
3.51	3
1.84	3
3.22	3
5	3
1.67	3
2.06	3
2.08	3
2.01	3
2.46	3
3.37	3
3	3
2.86	3
2.38	3
3.08	3
2.24	3
2.58	3
2.12	3
1.31	3
3.04	3
2.85	3
2.36	3
4.1	3
2.06	3
1.82	3
2.08	3
1.84	3
2.36	3
2.31	3
1.98	3
2.61	3
3.68	3
3.35	3
2.69	3
2.24	3
2.27	3
1.74	3
2.13	3
3.68	3
2.43	3
1.78	3
2.28	3
2.92	3
1.8	4
1.71	4
1.61	4
1.9	4
2.18	4
1.94	4
1.94	4
2.35	4
1.55	4
1.1	4
4.19	4
2.64	4
3.1	4
4.58	4
3.24	4
2.22	4
1.88	4
2.45	4
2.3	4
2.36	4
1.72	4
1.98	4
1.92	4
2.1	4
1.69	4
1.35	4
2.23	4
1.48	4
1.65	4
3.18	4
1.97	4
2.64	4
2.57	4
2.76	4
2.25	4
2.19	4
1.76	4
2.42	4
1.76	4
2.29	4
1.86	4
1.9	4
2.27	4
1.75	4
3.47	4
3.71	4
1.63	4
2.47	4
2.82	4
2.31	4
1.92	5
2.39	5
3.02	5
4.06	5
3.46	5
2.43	5
4.18	5
3.12	5
4.47	5
1.5	5
1.55	5
2.23	5
1.8	5
3.51	5
3.99	5
1.89	5
2.13	5
1.87	5
3.45	5
3.09	5
3.72	5
3.06	5
2.31	5
2.24	5
2.29	5
4.35	5
2.28	5
4	5
2.05	5
1.65	5
2.69	5
2.76	5
2.52	5
1.65	5
2.67	5
2.28	5
2.91	5
2.13	5
1.56	5
3.64	5
4.32	5
2.5	5
1.85	5
2.2	5
1.6	5
1.64	5
2.93	5
1.99	5
1.8	5
3.05	5
4.87	6
2	6
2.02	6
2.07	6
2.69	6
5.29	6
3.25	6
3.9	6
3.58	6
2.41	6
4.45	6
3.33	6
2.6	6
2.53	6
1.54	6
2.12	6
2.24	6
2.79	6
1.87	6
2.18	6
4.31	6
3.33	6
2.48	6
1.86	6
1.81	6
1.49	6
2	6
1.52	6
1.62	6
2.31	6
2.91	6
1.5	6
2.02	6
2.55	6
1.51	6
2.31	6
1.98	6
2.14	6
2.95	6
3.65	6
1.72	6
3.46	6
2.5	6
1.74	6
2.24	6
4.2	6
3.67	6
3.31	6
2.77	6
3.18	6
2.66	6
2.13	6
1.72	6
1.8	6
3.52	6
1.69	6
1.84	7
2.15	7
4.1	7
2.41	7
4.61	7
1.82	7
2.25	7
3.29	7
4.34	7
3.46	7
1.61	7
2.1	7
1.64	7
1.72	7
2.47	7
2.76	7
2.91	7
1.7	7
2.04	7
2.5	7
1.65	7
2.91	7
1.92	7
1.64	7
2.35	7
2.7	8
1.66	8
2.61	8
2.4	8
2.8	8
3.19	8
1.42	8
2.08	8
3.88	8
2.69	8
2.6	8
2.45	8
2.92	8
2.26	8
2.3	8
2.34	8
2.93	8
2.08	8
2.96	8
1.89	8
2.2	8
3.16	8
2.89	8
1.68	8
1.9	8
2.37	8
2.27	9
2.13	9
1.86	9
2.26	9
4.45	9
2.37	9
1.82	9
1.99	9
2.13	9
4.39	9
3.2	9
2.63	9
2.51	9
4.18	9
1.95	9
4.44	9
2.94	9
2.16	9
2.19	9
1.76	9
2.43	9
2.78	9
2.83	9
3.08	9
3.76	9
2.97	9
2.27	9
3.38	9
1.82	9
2.95	9
1.72	9
1.88	9
2.85	9
2.05	9
3.58	9
2.1	9
3.16	9
3.57	9
1.89	9
2.71	9
2.95	9
3.69	9
2.28	9
3.04	10
3.5	10
2.06	10
2.7	10
2.48	10
2.03	10
2.41	10
4.2	10
2.82	10
4.11	10
2.64	10
2.69	10
1.21	10
2.18	10
1.67	10
2.21	10
2.09	10
3.39	10
2.66	10
1.79	10
2.56	10
3.18	10
2.86	10
3.02	10
3.46	10
3.77	10
3.69	10
1.72	10
3.2	10
2.72	10
3.68	10
2.12	10
2.33	10
1.6	10
2.35	10
2.64	10
5.08	10
3.36	10
2.44	10
1.84	10
3.88	10
1.71	10
2.21	10
3.71	10
4.2	10
1.81	10
5.05	10
1.74	10
2.02	10
2.49	10
