# Supplementary material for: Impact of Guideline Markings on Saturation Flow Rate at Signalized Intersections
Source: Hindawi journal article supplement (doi:10.1155/2019/1786373), 2019-04-08
Supplement: f1 [file 1786373.f1.zip › 1786373.f1/Left-turn/Zhoujiazui Rd - Longchang Rd.xlsx]

## Sheet: Zhoujiazui Rd - Longchang Rd
Headway	Cycle number
2.72	1
1.79	1
2.8	1
1.8	1
1.97	1
2.64	1
3.19	1
1.99	1
3.01	1
4.18	1
1.84	2
3.73	2
3.66	2
1.93	2
2.88	2
2.62	2
2.9	2
1.63	3
1.4	3
2.01	3
2.31	3
2	3
2.71	3
1.99	3
2.92	3
2.52	3
4.13	3
2.25	4
2.49	4
2.55	4
2.27	4
2.65	4
2.95	4
3.19	4
3.52	5
3.49	5
1.77	5
1.92	5
2.46	5
2.68	5
2.62	5
2.37	5
2.13	5
2.1	5
2.06	5
2.91	5
3.77	5
3.45	6
3.62	6
2.06	6
4.87	6
2.45	6
2.67	6
2.03	6
1.88	7
1.85	7
3.6	7
2.33	7
2.24	7
2.74	7
3.77	7
2.15	8
2.2	8
2.06	8
1.61	8
1.63	8
2.44	8
1.55	8
3.24	8
1.92	8
2.34	8
2.1	8
3.05	8
2.25	8
2.53	8
1.93	8
