# Supplementary material for: Impact of Guideline Markings on Saturation Flow Rate at Signalized Intersections
Source: Hindawi journal article supplement (doi:10.1155/2019/1786373), 2019-04-08
Supplement: f1 [file 1786373.f1.zip › 1786373.f1/Through movement/Changyang Rd - Linqing Rd.xlsx]

## Sheet: Changyang Rd - Linqing Rd
Headway	Cycle number
2.15	1
3.38	1
3.11	1
2.94	1
3.24	1
2.25	1
2.19	1
1.95	1
2.6	1
2.86	1
2.8	1
1.89	1
2.17	1
1.97	1
1.44	1
2.94	1
3.22	1
2.72	1
1.77	1
2.14	1
1.91	1
2.7	1
2.94	1
3.41	1
2.83	2
2.15	2
1.51	2
1.83	2
1.79	2
1.77	2
1.98	2
2.4	2
2.28	2
2.35	2
1.48	2
2.57	2
3.7	2
2.11	2
2.76	2
4.26	2
2.34	2
2.41	2
2.5	2
2.25	2
1.84	2
3.23	2
1.94	2
1.87	2
1.44	2
1.69	2
2.9	2
2.21	2
3.09	2
3.18	2
2.56	3
4.09	3
2.79	3
2.17	3
1.93	3
3.53	3
1.34	3
3.52	3
3.43	3
3.24	3
2.14	3
2.24	3
3.12	3
2.67	3
4.2	3
3.14	3
4.61	3
2.41	3
1.69	3
2.79	3
2.13	3
2.39	3
3.59	3
1.84	3
1.77	3
2.58	3
4.39	3
3.2	3
2.55	4
2.91	4
1.25	4
4.5	4
6.34	4
2.97	4
1.54	4
3.14	4
2.38	4
1.6	4
2.76	4
2.75	4
2.36	4
5.76	4
2.37	4
2.11	4
2.46	4
2.3	4
1.93	4
2.99	4
2.19	4
3.57	4
4.47	4
2.89	4
2.41	4
2.13	4
2.37	4
3.26	5
2.87	5
1.24	5
1.72	5
2.18	5
3.01	5
2.48	5
1.64	5
4.43	5
2.86	5
4.19	5
2.24	5
2.05	5
2.29	5
1.71	5
2.19	5
2.14	5
1.96	5
1.85	5
3.21	5
3.3	5
2.54	5
2.65	5
2.39	5
4.12	5
1.85	6
1.97	6
1.66	6
2.21	6
1.7	6
4.09	6
2.03	6
1.68	6
2.71	6
2.98	6
1.28	6
2.47	6
3.41	6
2.15	6
2.49	6
2.8	6
1.96	6
2.31	6
1.94	7
2.68	7
4.61	7
2.39	7
1.68	7
5.19	7
1.88	7
1.47	7
1.96	7
3.04	7
1.51	7
2.67	7
2.45	7
1.97	7
2.44	7
2.94	7
4.42	7
1.74	7
1.66	7
2.48	7
1.96	7
1.91	7
2.12	7
2.28	7
2.01	7
1.66	7
2.78	7
4.1	7
2.58	7
2.11	8
2.71	8
3.18	8
2.29	8
4.6	8
2	8
2.37	8
2.27	8
2.17	8
2.73	8
4.4	8
2.96	8
2.3	8
2.37	8
2.15	8
2.58	8
1.7	8
2.12	8
2.58	8
4.86	8
2.53	8
2.68	8
2.55	8
1.71	8
1.97	8
2.81	8
3.16	8
1.69	8
2.94	8
2.3	8
2.27	8
3.26	9
2.87	9
3.41	9
2.15	9
2.49	9
2.8	9
2.7	9
2.92	9
4.42	9
2.74	9
2.66	9
2.48	9
2.96	9
1.91	9
2.12	9
2.28	9
2.01	9
3.66	9
2.598
