# Supplementary material for: Impact of Guideline Markings on Saturation Flow Rate at Signalized Intersections
Source: Hindawi journal article supplement (doi:10.1155/2019/1786373), 2019-04-08
Supplement: f1 [file 1786373.f1.zip › 1786373.f1/Through movement/Guoshun Rd - Huangxing Rd.xlsx]

## Sheet: Guoshun Rd - Huangxing Rd
Headway	Cycle number
2.21	1
2.43	1
2.37	1
2.92	1
4.07	1
2.5	1
2.04	1
2.25	1
3.8	1
3.52	1
2.95	1
4.31	1
3.47	1
2.13	1
2.1	1
2.49	1
3.31	1
2.32	1
3.13	1
2.31	1
2.49	1
2.79	1
2.32	1
3.59	1
2.21	1
2.46	1
1.98	1
2.61	1
4.71	1
2.37	1
2.05	1
2.31	1
2.35	1
2.12	1
2.91	1
4.47	1
2.9	1
3.36	1
2.92	1
2.68	1
2.27	1
3.42	1
2.15	1
3.41	1
3.3	1
2.93	1
2.54	1
3.09	1
3.64	1
3.48	1
3.15	1
1.28	1
2.56	1
1.61	1
2.18	1
1.14	1
1.21	1
2.74	1
1.99	1
1.96	1
3.29	1
3.23	1
2.5	1
1.69	1
1.97	1
2.71	1
1.42	1
1.52	1
2.87	1
1.9	1
2.07	1
1.67	1
2.17	1
1.35	1
1.46	1
2.81	1
2.91	1
3.72	1
2.92	1
2.81	1
2.98	1
3.07	1
2.69	1
2.52	1
2.64	1
3.2	2
2.94	2
2.06	2
1.91	2
1.62	2
2.48	2
2.93	2
1.87	2
1.8	2
2.36	2
2.54	2
3.37	2
1.89	2
1.63	2
1.54	2
1.43	2
2.85	2
1.29	2
2.22	2
2.52	2
4.56	2
2.69	2
1.61	2
2.9	2
2.38	2
1.91	2
2.73	2
1.91	2
1.26	2
3.05	2
2.34	2
2.37	2
1.81	2
2.18	2
1.21	2
2.22	2
2.3	2
1.21	2
2.23	2
3.05	2
3.45	2
1.81	2
2.6	2
2.14	2
2.76	2
2.3	2
4.3	2
2.41	2
3.76	2
2.77	2
4.44	2
2.77	2
3.45	2
2.24	2
2.34	2
3.68	2
2.51	2
4.03	2
2.09	2
1.66	2
2.89	2
2.94	2
2.36	2
1.93	2
1.83	2
3.35	2
2.36	2
2.96	2
2.72	2
3.15	2
3.11	2
2.19	2
4.1	2
3.62	2
2.8	2
2.75	2
1.49	2
2.02	2
2.44	2
2.46	2
2.73	2
2.78	2
3.18	2
1.83	2
4.08	2
2.13	2
4.02	2
1.37	2
2.78	2
2.73	2
2.83	2
2.3	2
3.5	2
4.09	2
2.89	2
1.99	2
1.6	2
3.12	2
1.78	2
1.96	2
1.68	2
2.59	2
2.53	2
4.1	2
2.44	2
4.11	2
4.12	3
2.61	3
1.87	3
4.8	3
1.37	3
2.12	3
4.04	3
3.9	3
2.94	3
3.61	3
1.77	3
1.57	3
1.91	3
2.4	3
2.2	3
1.26	3
1.43	3
4.1	3
2.22	3
2.71	3
4.14	3
2.83	3
1.73	3
2.05	3
2.87	3
1.79	3
4.35	3
2.81	3
2.8	3
1.99	3
1.94	3
2.96	3
1.34	3
3.3	3
4.11	3
2.79	3
1.36	3
2.66	3
3.9	3
3.39	3
1.32	3
4.24	3
1.87	3
4.01	3
1.73	3
2.72	3
1.51	3
1.15	3
1.67	3
2.93	3
1.5	3
4.24	3
2.64	3
2.59	3
3.33	3
4.06	3
2.71	3
4.39	3
2.48	3
3.2	3
4.01	3
4.04	3
1.14	3
1.22	3
3.87	3
3.85	3
2.56	3
3.15	3
1.81	3
1.45	3
3.9	3
1.63	3
2.82	3
3.01	3
2.96	3
3.19	3
3.15	3
3.37	3
2.65	3
2.21	3
3.06	3
3.89	3
2.28	3
1.69	3
1.67	3
1.79	3
4.24	3
3.08	3
2.53	3
3.91	3
2.56	3
2.78	3
4.17	3
2.86	3
2.88	4
2.9	4
3.93	4
2.7	4
3.12	4
3.7	4
2.99	4
2.59	4
1.87	4
3.74	4
3.71	4
2.73	4
3.61	4
2.35	4
2.38	4
1.63	4
3.4	4
2.23	4
1.27	4
1.89	4
4.27	4
2.56	4
2.23	4
3.6	4
2.12	4
3.25	4
2.38	4
1.94	4
2.27	4
1.86	4
2.54	4
4.04	4
1.93	4
1.44	4
1.17	4
3.68	4
3.54	4
1.66	4
2.17	4
2.69	4
1.46	4
2.66	4
1.83	4
1.47	4
2.03	4
4.12	4
1.71	4
2.01	4
2.9	4
1.54	4
2.5	4
3.32	4
1.21	4
2.31	4
3.63	4
2.35	4
3.92	4
4.14	4
2.97	4
2.32	4
2.33	4
1.26	4
2.82	4
2.76	4
1.59	4
2.62	4
1.81	4
3.07	4
1.99	4
1.33	4
2.41	4
1.36	4
1.53	4
2.32	4
2.27	4
2.85	4
4.16	4
4.11	4
2.38	4
2.29	4
1.36	4
2.44	4
1.39	4
2.03	4
3.37	4
3.25	4
2.28	4
1.9	4
1.79	4
2.85	4
4.01	4
1.47	4
1.6	4
2.35	4
1.84	4
3.83	4
2.21	5
3.05	5
1.86	5
1.94	5
3.98	5
4.03	5
4.18	5
1.32	5
2.1	5
2.86	5
2.75	5
0.65	5
2.04	5
3.73	5
3.3	5
3.18	5
2.53	5
3.12	5
4.27	5
2.18	5
2.33	5
3.28	5
1.42	5
1.79	5
2.48	5
2.62	5
6.02	5
3.29	5
1.27	5
2.4	5
1.16	5
1.45	5
1.57	5
4.6	5
1.91	5
4.86	5
4.07	5
1.56	5
1.15	5
1.86	5
3.27	5
1.31	5
2.4	5
1.89	5
1.73	5
3.11	5
1.24	5
2.34	5
1.21	5
3.79	5
1.68	5
2.56	5
2.19	5
2.95	5
1.45	5
1.84	5
2.2	5
1.41	5
4.07	5
2.35	5
2.19	5
2.17	5
1.32	5
3.74	5
1.67	5
2.65	5
3.45	5
1.68	5
2.87	5
2.95	5
3.69	5
1.79	5
4.05	5
2.24	5
2.64	5
1.32	5
1.43	5
3.25	5
4.38	5
3.28	5
4.24	6
2.46	6
3.89	6
2.87	6
2.58	6
3.21	6
2.94	6
2.38	6
2.71	6
1.61	6
3.44	6
3.18	6
4.14	6
1.69	6
1.64	6
1.82	6
1.77	6
1.86	6
1.77	6
2.12	6
4.07	6
2.42	6
2.74	6
3.19	6
4.81	6
1.66	6
1.5	6
3.27	6
3.13	6
1.33	6
1.73	6
2.87	6
3.13	6
1.89	6
2.77	6
4.02	6
1.83	6
2.88	6
4.25	6
1.26	6
3.2	6
2.88	6
2.96	6
4.49	6
1.85	6
2.09	6
3.15	6
1.82	6
2.44	6
2.61	6
1.82	6
3.81	6
2.31	6
1.89	6
2.64	6
2.51	6
3.52	6
1.31	6
1.42	6
3.09	6
2.81	6
4.05	6
2.94	6
1.36	6
3.25	6
2.06	6
2.89	6
3.76	6
3.98	6
1.86	6
2.91	6
2.34	6
4.37	6
3.25	6
1.83	6
1.66	6
1.51	6
2.34	6
1.45	6
2.63	6
2.18	6
2.67	6
3.43	6
3.2	6
3.46	6
2.37	7
2.7	7
2.1	7
4.01	7
2.83	7
2.91	7
2.73	7
2.4	7
2.25	7
3.42	7
3.14	7
2.22	7
2.99	7
2.32	7
1.52	7
2.29	7
2.43	7
3.52	7
2.94	7
3.9	7
2.61	7
4.04	7
2.24	7
1.8	7
2.28	7
3.19	7
4.07	7
2.21	7
4.49	7
1.84	7
2.23	7
2.59	7
2.85	7
3.34	7
1.53	7
3.3	7
2.66	7
3.09	7
4.13	7
1.85	7
1.91	7
2.09	7
2.63	7
2.44	7
2.13	7
2.86	7
3.87	7
1.98	7
1.8	7
3.07	7
3.06	7
4.08	7
2.49	7
1.92	7
5.81	7
3.25	7
2.64	7
2.08	7
2.76	7
2.47	7
3.63	7
3.1	7
2.4	7
4.55	7
2.91	7
1.76	7
2.2	7
2.04	7
2.35	7
4.07	7
2.07	7
3.28	7
3.23	8
3.99	8
3.14	8
2.43	8
3.13	8
1.8	8
4.32	8
2.33	8
2.45	8
2.59	8
2.86	8
2.99	8
2.9	8
1.77	8
3.02	8
2.21	8
2.21	8
4.49	8
1.84	8
2.23	8
2.59	8
2.85	8
3.34	8
3.23	8
2.3	8
2.66	8
3.09	8
2.13	8
2.36	8
2.53	8
2.32	8
2.27	8
2.85	8
4.16	8
4.11	8
2.38	8
2.29	8
2.36	8
2.44	8
3.39	8
3.03	8
