# Supplementary material for: Impact of Guideline Markings on Saturation Flow Rate at Signalized Intersections
Source: Hindawi journal article supplement (doi:10.1155/2019/1786373), 2019-04-08
Supplement: f1 [file 1786373.f1.zip › 1786373.f1/Through movement/Guoshun Rd - Yingkou Rd.xlsx]

## Sheet: Guoshun Rd - Yingkou Rd
Headway	Cycle number
2.03	1
1.95	1
1.26	1
2.09	1
2.39	1
2.02	1
2.09	1
2.87	1
2.8	1
2.91	1
2.53	2
2.82	2
1.97	2
2.86	2
3.71	2
2.6	2
2.08	2
1.69	2
2.11	2
2.58	2
2.16	2
3.57	2
3.06	2
3.71	2
1.98	2
1.88	2
1.34	2
2.13	2
1.73	2
2.76	2
2.04	2
2.38	3
2.02	3
1.75	3
2.07	3
2.89	3
2.94	3
2.15	3
0.88	3
2.4	3
1.08	3
2.35	3
2.46	3
2.51	3
2.32	4
3.08	4
2.88	4
1.91	4
2.38	4
1.64	4
2.75	4
3.99	4
2.85	4
3.74	4
3.78	4
4.16	4
1.99	4
1.59	4
1.87	4
1.97	4
1.49	4
1.99	4
2.69	4
1.82	4
1.99	4
1.72	4
1.51	4
2.8	4
1.53	4
2.41	5
2.13	5
3.23	5
2.3	5
2.9	5
2.97	5
1.89	5
2.46	5
2.25	5
3.91	5
3.96	5
2.41	5
4.6	5
2.51	5
2.22	5
3.36	5
3.13	5
2.21	5
1.95	5
1.79	5
2.35	6
2.45	6
1.68	6
2.21	6
2.91	6
1.9	6
2.08	6
1.77	6
2.09	6
4.14	6
2.81	6
2	6
3.29	6
2.76	6
2.29	6
2.92	6
3.23	6
1.93	6
2.07	6
3.37	6
2.22	6
3.05	6
2.74	7
2.09	7
2.04	7
1.21	7
1.5	7
1.35	7
2.58	7
1.21	7
2.6	7
1.87	7
1.21	7
1.94	7
2.28	7
2.9	7
2.28	7
1.82	7
1.62	7
3.77	7
2.71	7
2.47	7
2.05	7
1.95	8
3.02	8
4.04	8
3.73	8
2.12	8
2.64	8
1.86	8
2.53	9
2.82	9
1.97	9
2.86	9
3.71	9
2.6	9
2.08	9
1.69	9
2.11	9
3.58	9
2.16	9
3.57	9
3.06	9
3.71	9
1.98	9
1.88	9
1.34	9
2.13	9
1.73	9
2.76	9
4.04	9
2.49	9
3.21	9
3.32	9
2.57	9
2.31	9
2.43	9
2.99	9
2.42	9
1.96	9
2.54	9
3.73	9
2.3	9
1.5	9
2.13	9
1.9	9
2.55	9
2.38	10
2.02	10
1.75	10
2.07	10
3.89	10
2.94	10
2.15	10
2.88	10
2.4	10
4.08	10
3.35	10
4.46	10
2.51	10
2.19	10
1.99	10
2.34	10
3.04	10
2.49	10
3.59	10
2.67	10
2.94	10
2.37	10
2.26	10
2.07	10
2.73	10
1.8	10
2.74	10
1.75	10
2.42	10
2.69	10
2.79	10
2.52	10
2.36	10
2.07	10
2.07	10
3.06	10
1.84	10
2.18	10
1.71	10
2.37	10
3.8	10
2.89	10
2.46	10
1.88	10
2.24	10
2.2	10
3.96	10
1.96	10
2.35	10
1.6	10
1.54	10
2.28	10
2.3	10
2.85	10
3.19	10
2.19	10
2.08	10
2.65	10
2.88	10
2.17	10
2.53	10
1.68	10
2.57	10
2.79	10
2.78	10
3.16	10
2.93	10
1.91	10
1.26	10
2.22	10
2.24	10
1.94	10
3.57	10
2.78	10
3.09	10
2.94	10
2.03	11
1.95	11
1.26	11
2.09	11
2.39	11
2.94	11
2.15	11
2.88	11
2.4	11
2.08	11
1.85	11
2.46	11
2.51	11
2.19	11
1.99	11
2.34	11
3.04	11
2.49	11
1.59	11
2.67	11
2.94	11
2.37	11
2.26	11
2.07	11
2.73	11
1.8	11
2.74	11
1.75	11
2.42	11
2.69	11
