# Supplementary material for: Impact of Guideline Markings on Saturation Flow Rate at Signalized Intersections
Source: Hindawi journal article supplement (doi:10.1155/2019/1786373), 2019-04-08
Supplement: f1 [file 1786373.f1.zip › 1786373.f1/Through movement/Haining Rd - Zhoujiazui Rd.xlsx]

## Sheet: Haining Rd - Zhoujiazui Rd
Headway	Cycle number
3.63	1
1.99	1
1.09	1
1.56	1
0.25	1
2.18	1
0.9	1
1.19	1
2.07	1
0.31	1
4.14	1
0.3	1
1.41	1
3.44	1
3.3	1
1.23	1
2.87	1
3.08	1
5.17	1
2.48	1
2.8	1
2.9	1
2.2	1
2.96	1
2.87	1
1.76	1
0.35	1
1.39	1
0.91	1
1.37	1
2.05	1
0.36	1
2.37	1
0.69	1
1.59	1
0.83	1
1.39	1
3.13	1
2.66	1
1.93	1
1.44	1
4.24	1
2.81	1
1.69	1
3.44	1
2.3	1
2.89	1
1.97	1
2.82	1
2.78	1
2.3	1
0.17	1
2.75	1
1.68	1
0.93	1
0.39	1
1.62	1
1.81	1
2.04	1
0.81	1
3.27	1
0.54	1
2.01	1
1.86	1
1.76	1
3.26	1
1.27	1
2.5	1
3.05	1
0.93	1
1.81	1
3.56	1
1.83	1
4.31	2
1.95	2
2.66	2
1.17	2
2.24	2
3.06	2
3.22	2
2.94	2
3.41	2
3.59	2
0.5	2
3.4	2
3.55	2
4.22	2
1.7	2
1.98	2
2.4	2
1.74	2
1.25	2
1.98	2
1.08	2
2.21	2
1.45	2
3.6	2
1.66	2
2.82	2
2.21	2
3.49	2
4.38	2
1.79	2
1.67	2
2.84	2
3.58	2
1.47	2
1.94	2
2.28	2
2.55	2
1.25	2
5.02	2
2.47	2
1.92	2
1.66	2
1.62	2
2.16	2
4.26	2
1.29	2
3.39	2
1.96	2
2.16	2
2.12	3
1.8	3
2.51	3
2.22	3
2.86	3
4.44	3
2.82	3
3.59	3
3.5	3
3.18	3
1.32	3
1.93	3
2.86	3
2.76	3
2.6	3
1.96	3
3.43	3
2.32	3
2.35	3
2.46	3
3.43	3
2.3	3
3.07	3
3.34	3
2.4	3
4.5	3
3.5	3
4.1	3
1.74	3
2.2	3
4.37	3
1.75	3
3.34	3
4.01	3
2.25	3
2.31	3
0.98	3
2.05	3
3.96	3
3.97	3
2.62	3
1.92	3
1.46	3
2.65	3
3.58	3
4.35	3
2.95	3
1.94	3
2.41	3
4.89	3
3.24	3
1.85	3
4.95	3
2.57	3
1.88	3
1.99	3
2.54	3
2.23	3
2.14	3
2.87	3
2.48	4
2.11	4
2.34	4
3.18	4
2.55	4
4.27	4
1.95	4
3.44	4
3.23	4
2.19	4
2.4	4
3.42	4
3.54	4
1.78	4
2.39	4
4.14	4
2.56	4
2.52	4
2.14	4
3.8	4
2.18	4
3.83	4
3.98	4
2.24	4
3.21	4
2.65	4
3.02	4
1.78	4
2.25	4
2.31	4
2.51	4
2.92	4
2.92	4
2.76	4
1.85	4
2.01	4
3.6	4
2.27	4
3.3	4
4.1	4
4.95	4
1.03	4
5.13	4
2.94	4
2.36	4
4.25	4
3.87	4
3.06	4
2.21	4
2.4	4
3.43	4
3.39	4
3.42	4
4.82	4
1.96	4
1.42	4
2.72	4
2.78	4
1.35	5
3.45	5
2.22	5
2.35	5
2.43	5
5.15	5
2.98	5
0.78	5
2.58	5
1.54	5
2.82	5
4.52	5
2.51	5
1.67	5
2.36	5
2.76	5
1.85	5
3.15	5
4.49	5
3.86	5
2.15	5
2.93	5
3.73	5
2.44	5
1.61	5
2.28	5
2.8	5
3.25	5
1.42	5
2.94	5
3.7	5
2.74	5
3.36	5
1.77	5
2.21	6
2.43	6
1.37	6
1.92	6
4.07	6
2.5	6
2.04	6
2.25	6
3.8	6
3.52	6
2.95	6
1.81	6
3.47	6
2.13	6
2.1	6
2.49	6
3.31	6
2.32	6
3.13	6
2.31	6
2.49	6
2.79	6
2.32	6
3.59	6
2.21	6
2.46	6
1.98	6
2.61	6
4.71	6
2.37	6
2.05	6
2.31	6
2.35	6
2.12	6
2.91	6
1.47	6
2.9	6
3.36	6
2.92	6
2.68	6
2.27	6
3.42	6
2.15	6
3.41	6
3.3	6
2.93	6
2.54	6
1.41	6
2.07	6
1.6	6
1.19	6
2.37	6
2.22	6
2.09	6
0.64	6
3.48	6
3.15	6
1.28	6
2.56	6
1.61	6
2.18	6
1.14	6
1.21	6
2.74	6
1.99	6
1.96	6
3.29	6
3.23	6
2.5	6
1.69	6
1.97	6
2.71	6
1.42	6
1.52	6
2.87	6
1.9	6
2.07	6
1.67	6
2.17	6
1.35	6
1.46	6
2.81	6
1.91	6
1.72	6
2.92	6
2.81	6
2.98	6
3.07	6
1.69	6
2.52	6
2.64	6
3.23	7
3.99	7
3.14	7
2.43	7
3.13	7
1.8	7
4.32	7
2.33	7
2.45	7
2.59	7
2.86	7
2.99	7
2.9	7
1.77	7
3.02	7
2.21	7
2.21	7
4.49	7
1.84	7
2.23	7
2.59	7
2.85	7
3.34	7
3.23	7
2.3	7
2.66	7
3.09	7
2.13	7
2.36	7
2.53	7
2.32	7
2.27	7
2.85	7
4.16	7
4.11	7
2.38	7
2.29	7
2.36	7
2.44	7
3.39	7
2.03	7
1.48	8
1.37	8
2.46	8
3.72	8
2.21	8
3.77	8
2.3	8
4.54	8
1.87	8
2.49	8
1.94	8
2.61	8
1.79	8
2.38	8
4.05	8
1.51	8
2.29	8
3.16	8
3.9	8
1.64	8
3.77	8
2.22	8
6.74	8
3.04	8
1.93	8
2.02	8
3.06	8
2.3	8
3.03	8
3.33	8
2.82	8
2.26	8
2.22	8
2.72	8
3.63	8
2.05	8
2.24	8
2.89	8
1.64	8
1.99	8
1.84	8
3.27	8
2.01	8
1.37	8
4.08	8
2.27	8
2.7	8
2.8	8
3.48	8
1.9	8
3.84	8
2.84	8
