# Supplementary material for: Impact of Guideline Markings on Saturation Flow Rate at Signalized Intersections
Source: Hindawi journal article supplement (doi:10.1155/2019/1786373), 2019-04-08
Supplement: f1 [file 1786373.f1.zip › 1786373.f1/Through movement/Henan Rd - Beijing Rd.xlsx]

## Sheet: Henan Rd - Beijing Rd
Headway	Cycle number
2.16	1
2.49	1
2.36	1
1.95	1
1.85	1
1.75	1
1.87	1
3.38	1
2.28	1
2.48	1
2.4	1
1.46	1
2.26	1
2.89	1
2.85	1
2.54	1
2.26	1
2.88	1
2.31	2
1.54	2
1.71	2
2.8	2
2.59	2
2.3	2
1.84	2
1.55	2
3.07	2
1.66	2
3.05	2
2.06	2
2.14	2
1.6	2
2.44	2
2.79	2
1.76	2
2.77	2
3.53	2
2.37	2
2.27	3
3.08	3
2.65	3
2.06	3
2.68	3
2.22	3
1.98	3
2.98	3
2.42	3
3.57	3
2.98	3
2.32	3
2.89	3
1.73	3
1.58	3
2.39	3
2.69	3
2.94	3
1.11	4
1.82	4
1.29	4
1.83	4
1.82	4
2.84	4
2.65	4
3	4
2.53	4
2.52	4
2.89	4
2.58	4
3.03	4
1.98	4
2.03	4
1.71	4
1.95	4
1.97	4
2.2	5
1.84	5
2.32	5
1.79	5
4.65	5
2.12	5
2.27	5
3.91	5
2.42	5
1.91	5
1.91	5
2.06	5
2.42	5
2.28	5
2.54	5
2.81	6
2.26	6
1.48	6
1.96	6
1.97	6
2.52	6
1.59	6
1.92	6
1.69	6
3.04	6
2.48	6
2.02	6
3.32	6
3.92	6
2.57	6
2.54	6
4.12	6
3.08	6
2.15	7
2.14	7
1.73	7
3.68	7
2.61	7
1.73	7
2.78	7
3.49	7
3.39	7
1.5	7
2.99	7
2.29	7
2.87	7
2.4	7
2.33	7
2.79	7
2.41	7
2.46	7
2.48	8
2.4	8
1.46	8
2.26	8
1.89	8
2.85	8
2.54	8
2.26	8
1.88	8
3.2	9
1.94	9
2.06	9
1.91	9
1.62	9
2.48	9
2.93	9
1.87	9
1.8	9
1.36	9
2.54	9
1.37	9
1.89	9
1.63	9
2.3	9
1.21	9
2.23	9
3.05	9
2.45	9
1.81	9
2.6	9
2.14	9
2.76	9
2.3	9
1.3	9
1.41	9
1.76	9
