# Supplementary material for: Impact of Guideline Markings on Saturation Flow Rate at Signalized Intersections
Source: Hindawi journal article supplement (doi:10.1155/2019/1786373), 2019-04-08
Supplement: f1 [file 1786373.f1.zip › 1786373.f1/Through movement/Henan Rd - Yanan Rd.xlsx]

## Sheet: Henan Rd - Yanan Rd
Headway	Cycle number
1.48	1
1.37	1
2.46	1
3.72	1
2.21	1
3.77	1
2.3	1
4.54	1
1.87	1
2.49	1
1.94	1
2.61	1
1.79	1
2.38	1
4.05	1
1.51	1
2.29	1
3.16	1
3.9	1
1.64	1
3.77	1
2.22	1
6.74	1
3.04	1
1.93	1
2.02	1
3.06	1
2.3	1
3.03	1
3.33	1
2.82	1
2.26	1
2.22	1
2.72	1
4.63	1
2.05	1
2.24	1
2.89	1
1.64	1
1.99	1
1.84	1
4.27	1
2.01	1
1.37	1
4.08	1
2.27	1
2.7	1
2.8	1
3.48	1
1.9	1
3.84	1
2.84	1
3.29	1
5.82	2
2.07	2
1.61	2
2.66	2
2.86	2
2.2	2
2.16	2
2.91	2
1.8	2
2.48	2
1.71	2
2.37	2
2.16	2
3.43	2
2.17	2
4.06	2
1.64	2
2	2
4.54	2
2.21	2
2.44	2
2.36	2
3.43	2
1.69	2
4.01	2
2.17	2
2.77	2
2.92	2
1.97	2
2.23	2
2.02	2
2.77	2
2.62	2
2.95	2
2.28	2
2.93	2
1.95	2
3.62	2
2.61	2
4.45	2
1.79	2
1.96	2
2.49	2
2.29	2
2.62	2
2.22	2
5.34	2
2.27	3
2.78	3
2.72	3
1.74	3
3.79	3
1.84	3
1.85	3
2.15	3
1.79	3
1.43	3
1.59	3
2.52	3
3.56	3
2.86	3
3.43	3
2.71	3
2.54	3
2.4	3
3.06	3
4.49	3
3.07	3
2.1	3
1.73	3
1.38	3
1.59	3
1.72	3
4.77	3
1.86	3
1.9	3
2.87	3
2.6	3
1.43	3
1.58	3
1.74	3
3	3
1.8	3
2.22	3
2.09	3
6.09	3
2.86	3
2.9	3
2.14	3
3.67	3
2.28	3
1.52	3
4.02	3
3.3	3
2.35	3
2.12	3
2.15	3
2.67	3
2.29	3
3.46	3
2.37	4
2.87	4
4.98	4
1.5	4
1.84	4
3.7	4
3.01	4
1.89	4
2.18	4
2.59	4
2.82	4
3.26	4
4.06	4
4	4
2.22	4
2.21	4
3.44	4
2.44	4
2.1	4
2.26	4
4.07	4
3.55	4
2.89	4
1.41	4
2.65	4
1.78	4
2.71	4
4.12	4
3.5	4
2.68	4
3.46	4
2.16	4
3.17	4
1.95	4
1.78	4
1.99	4
1.89	4
2.16	4
2.03	4
1.74	4
1.94	4
1.37	4
1.45	4
5.09	4
4.37	4
2.6	4
2.35	5
3.49	5
2.33	5
2.37	5
2.17	5
2.24	5
1.66	5
3.11	5
2.97	5
2.95	5
2.7	5
1.95	5
1.69	5
2.52	5
2	5
2.5	5
1.93	5
1.42	5
1.55	5
1.74	5
2.94	5
4.45	5
2.64	5
1.97	5
1.72	5
1.75	5
2.27	5
2.23	5
2.07	5
1.41	5
3.93	5
3.2	5
2.46	5
3.06	5
4.18	5
4.99	5
2.51	5
1.83	5
2.7	5
2.27	5
4.91	5
2.15	5
1.92	5
2.68	5
1.95	5
2.79	5
3.28	5
2.27	6
1.98	6
5	6
2.48	6
1.73	6
2.67	6
2.4	6
2.23	6
1.92	6
2.48	6
2.59	6
1.94	6
2.66	6
1.73	6
2.77	6
2.49	6
4.63	6
1.3	6
2.21	6
3.17	6
2.54	6
1.93	6
1.22	6
1.86	6
1.38	6
3.75	6
1.61	6
1.39	6
1.27	6
1.56	6
1.68	6
1.56	6
3.3	6
3.63	6
3.43	6
2.15	6
2.74	6
2.38	6
2.34	6
3.54	6
1.67	6
1.96	6
3.99	6
4.62	6
1.44	6
2.07	6
3.7	6
1.45	6
1.51	6
1.57	6
1.73	6
2.28	6
2.34	6
2.99	6
2.19	6
1.98	6
2.49	6
3.59	6
3.02	7
2.02	7
2.18	7
3.56	7
1.9	7
2.86	7
5.3	7
1.81	7
2.08	7
2.02	7
2.33	7
2.85	7
2.93	7
2.15	7
3.4	7
2.6	7
2.16	7
1.75	7
4.9	7
1.89	7
3.66	7
1.98	7
2.35	7
1.28	7
3.85	7
2.47	7
3.31	7
3.41	7
1.74	7
2.42	7
4.95	7
1.71	7
3.99	7
1.71	7
2.16	7
1.3	7
3.08	7
2.66	7
1.42	7
3.28	7
3.09	7
2.85	7
3.49	8
2.47	8
4.19	8
2.07	8
1.98	8
1.77	8
2.9	8
2.46	8
3.06	8
3.27	8
2.7	8
2.45	8
2.87	8
2.65	8
3.45	8
2.54	8
3.06	8
2.74	8
3.45	8
3.49	8
2.61	8
2.5	8
2.66	8
2.62	8
2.14	8
2.3	8
2.77	8
2.39	8
2.69	8
2.13	8
1.64	8
1.37	8
1.4	8
3.78	8
3.18	8
3.05	8
2.6	8
3.08	8
2.53	8
2.88	8
1.29	8
2.69	8
1.85	8
3.47	8
2.26	8
4.85	8
4.07	8
2.24	8
2.47	8
1.71	8
2.37	8
3.15	8
4.7	8
2.02	8
