# Supplementary material for: Impact of Guideline Markings on Saturation Flow Rate at Signalized Intersections
Source: Hindawi journal article supplement (doi:10.1155/2019/1786373), 2019-04-08
Supplement: f1 [file 1786373.f1.zip › 1786373.f1/Through movement/Jinhai Rd - Jinke Rd.xlsx]

## Sheet: Jinhai Rd - Jinke Rd
Headway	Cycle number
3.63	1
3.08	1
1.81	1
3.08	1
3.57	1
4.14	1
1.71	1
3.44	1
2.3	1
2.89	1
1.97	1
2.82	1
2.78	1
2.3	1
4.6	1
1.32	1
1.32	1
3.27	1
2.55	1
2.9	1
2.2	1
2.96	1
4.63	1
2.65	1
3.42	1
3.42	1
2.42	1
2.42	1
3.22	2
2.94	2
3.41	2
3.59	2
2.47	2
2.47	2
2.82	2
2.21	2
3.49	2
3.38	2
4.38	2
2.82	3
3.59	3
2.95	3
1.94	3
2.41	3
3.24	3
2.4	3
4.5	3
3.5	3
4.1	3
1.74	3
2.2	3
4.37	3
2.55	4
4.27	4
3.95	4
3.44	4
3.23	4
1.03	4
3.13	4
2.94	4
2.36	4
4.25	4
3.87	4
3.06	4
2.21	4
2.4	4
3.43	4
3.39	4
3.42	4
3.8	4
2.18	4
3.83	4
3.98	4
2.24	4
3.21	4
2.65	4
3.02	4
1.78	4
2.25	4
2.31	4
2.51	4
2.92	4
5.82	5
2.07	5
1.61	5
2.66	5
2.86	5
2.2	5
2.16	5
2.91	5
1.8	5
2.48	5
1.71	5
2.37	5
2.16	5
3.43	5
2.17	5
4.06	5
1.64	5
4.2	5
4.54	5
2.21	5
2.44	5
2.36	5
3.43	5
1.69	5
4.01	5
2.17	5
2.77	5
2.92	5
1.97	5
2.23	5
2.02	5
2.77	5
2.62	5
2.95	5
2.28	5
2.93	5
1.95	5
3.62	5
2.61	5
4.45	5
1.79	5
1.96	5
2.49	5
2.29	5
2.62	5
2.92	5
5.34	5
3.22	6
2.94	6
3.41	6
3.59	6
2.47	6
2.47	6
2.82	6
2.21	6
3.49	6
3.38	6
4.38	6
2.82	6
3.59	6
3.03	6
3.13	6
2.94	6
2.36	6
4.25	6
3.87	6
3.06	6
2.21	6
2.4	6
5.82	7
2.07	7
1.61	7
2.66	7
2.86	7
2.2	7
2.16	7
2.91	7
3.8	7
2.48	7
1.71	7
2.37	7
2.16	7
3.43	7
2.17	7
4.06	7
2.64	7
3.2	7
4.54	7
2.21	7
2.44	7
2.36	7
3.43	7
1.69	7
4.01	7
2.17	7
2.77	7
2.92	7
1.97	7
2.23	7
2.02	7
2.77	7
2.62	7
2.95	7
4.28	7
2.93	7
2.35	7
3.62	7
2.61	7
4.45	7
2.79	7
2.96	7
2.49	7
4.2	7
