# Supplementary material for: Impact of Guideline Markings on Saturation Flow Rate at Signalized Intersections
Source: Hindawi journal article supplement (doi:10.1155/2019/1786373), 2019-04-08
Supplement: f1 [file 1786373.f1.zip › 1786373.f1/Through movement/Jinke Rd - Zuchongzhi Rd.xlsx]

## Sheet: Jinke Rd - Zuchongzhi Rd
Headway	Cycle number
3.63	1
3.08	1
1.81	1
3.08	1
3.57	1
4.14	1
1.71	1
3.44	1
2.3	2
2.89	2
1.97	2
2.82	2
2.78	2
2.3	2
4.6	2
1.32	2
1.32	2
3.27	2
2.55	2
2.9	3
2.2	3
2.96	3
4.63	3
2.65	3
3.42	3
3.42	3
2.42	3
2.42	3
3.22	4
2.94	4
3.41	4
3.59	4
2.47	5
2.47	5
2.82	5
2.21	5
3.49	5
3.38	5
4.38	5
2.82	5
3.59	5
2.4	6
4.5	6
3.5	6
4.1	6
1.74	6
2.2	6
4.37	6
2.55	7
4.27	7
1.95	7
3.44	7
3.23	7
1.03	7
3.13	7
2.94	7
2.36	7
4.25	7
3.87	7
3.06	7
2.21	7
2.4	7
3.8	8
2.18	8
3.83	8
3.98	8
2.24	8
3.21	8
2.65	8
3.02	8
1.78	8
2.25	8
2.31	8
2.51	8
2.92	8
1.35	9
0.59	9
2.52	9
1.1	9
2.19	9
2.47	9
1.38	9
2.5	10
0.78	10
1.19	10
1.49	10
2.12	10
0.92	10
1.81	10
2.46	10
1.51	10
1.76	10
3.59	10
3.96	11
1.39	11
1.03	11
1.03	11
2.2	11
2.41	11
0.89	11
1.32	11
2.42	11
2.22	12
1.39	12
2.36	12
2.43	12
1.27	12
1.78	12
1.29	12
3.72	13
2.38	13
3.26	13
2.16	13
1.12	13
1.45	13
2.75	13
2.3	13
3.25	13
1.08	13
1.78	13
1.26	13
2.07	13
1	13
1.86	13
1.66	13
1.17	13
1.92	14
1.53	14
1.96	14
1.92	14
1.74	14
1.98	14
1.93	14
1.77	14
1.22	14
0.96	14
1.08	14
1.97	14
1.35	14
0.91	14
3.55	14
1.91	15
1.87	15
1.85	15
2.65	15
1.78	15
1.8	15
1.79	15
2.02	15
1.55	15
1.33	15
1.06	15
1.7	15
1.54	15
0.7	15
2.68	15
3.99	15
2.72	16
3.49	16
1.96	16
2.8	16
2.15	17
1.92	17
1.8	17
1.13	17
1.56	17
1.41	17
1.6	18
2.26	18
2.42	18
0.96	18
2.17	18
2.6	18
1.51	18
1.62	18
3.12	18
2.6	18
