# Supplementary material for: Impact of Guideline Markings on Saturation Flow Rate at Signalized Intersections
Source: Hindawi journal article supplement (doi:10.1155/2019/1786373), 2019-04-08
Supplement: f1 [file 1786373.f1.zip › 1786373.f1/Through movement/Jungong Rd - Changyang Rd(with intersection guide line).xlsx]

## Sheet: Jungong Rd - Changyang Rd
Headway	Cycle number
2.39	1
2.21	1
2.23	1
2.43	2
1.65	2
2.7	2
1.07	2
2.36	2
1.76	2
2.81	2
2.63	2
2.37	2
2.44	2
2.7	2
1.94	2
2.32	2
1.76	2
1.71	2
2.84	2
2.57	3
1.99	3
1.93	3
2.63	3
2.14	3
2.73	3
1.57	3
2.59	3
1.91	3
2.7	3
3.13	3
4.38	3
2.47	3
3.64	4
3.25	4
2.35	4
1.32	4
1.9	4
2.76	4
1.77	4
2.62	4
1.36	4
1.86	4
2.31	4
2.43	4
2.15	4
2.77	5
2.93	5
1.58	5
2.14	5
1.74	5
2.26	5
4.09	5
4.13	5
3.08	5
2.13	6
2.68	6
2.15	6
2.89	6
3.35	6
3.01	6
3.03	7
1.79	7
2.02	7
3	7
2.63	7
2.01	7
3.17	8
2.96	8
2.65	8
1.95	8
2.74	8
2.24	8
2.01	8
3.81	8
2.69	9
3.02	9
2.36	9
2.52	9
2.43	9
1.96	9
1.62	9
1.72	9
2.92	9
3.28	9
2.38	10
2.6	10
2.05	10
2.23	10
2.19	10
2.02	10
3.06	10
