# Supplementary material for: Impact of Guideline Markings on Saturation Flow Rate at Signalized Intersections
Source: Hindawi journal article supplement (doi:10.1155/2019/1786373), 2019-04-08
Supplement: f1 [file 1786373.f1.zip › 1786373.f1/Through movement/Jungong Rd - Changyang Rd.xlsx]

## Sheet: Jungong Rd - Changyang Rd
Headway	Cycle number
2.86	1
1.76	1
3.6	1
2.39	1
4.51	1
3.28	1
3.66	1
3.08	1
2.47	2
2.01	2
2.07	2
3.19	2
2.14	2
3.67	2
2.63	2
2.96	2
2.91	2
1.91	2
3.2	2
1.39	3
3.07	3
2.91	3
2.49	3
2.68	3
3.57	3
3.48	3
3.1	4
3.22	4
1.33	4
1.97	5
1.88	5
2.22	5
2.15	5
2.1	5
2.39	5
1.94	5
1.93	5
2.86	6
1.76	6
3.6	6
2.39	6
2.14	6
3.67	6
1.63	6
2.96	6
2.91	6
1.91	6
3.2	6
2.47	7
2.01	7
2.07	7
3.19	7
2.14	7
3.67	7
1.94	7
1.93	7
2.91	7
1.91	7
3.2	7
3.1	8
3.22	8
1.33	8
2.1	8
2.39	8
1.94	8
1.93	8
2.91	8
1.91	8
3.2	8
2.21	9
2.43	9
1.37	9
1.92	9
4.07	9
2.5	9
2.04	9
2.25	9
3.8	9
3.52	9
2.95	9
1.81	9
3.47	9
2.13	9
3.2	10
2.94	10
2.06	10
1.91	10
1.62	10
2.48	10
2.93	10
1.87	10
1.8	10
1.36	10
2.54	10
1.37	10
1.89	10
1.63	10
2.54	10
2.43	10
2.85	10
1.29	10
2.22	10
2.52	10
4.56	10
1.39	11
3.07	11
2.91	11
2.49	11
2.68	11
2.39	11
1.94	11
1.93	11
2.91	11
2.91	11
3.2	11
