# Supplementary material for: Impact of Guideline Markings on Saturation Flow Rate at Signalized Intersections
Source: Hindawi journal article supplement (doi:10.1155/2019/1786373), 2019-04-08
Supplement: f1 [file 1786373.f1.zip › 1786373.f1/Through movement/Jungong Rd - Xiangying Rd.xlsx]

## Sheet: Jungong Rd - Xiangying Rd
Headway	Cycle number
2.75	1
2.61	1
2.01	1
1.81	1
2.04	1
4.62	1
2.11	1
2.39	1
2.28	1
2.41	1
2.37	1
2.28	1
2.22	1
2.65	1
2.43	1
2.09	1
2.07	1
2.94	2
2.28	2
2.55	2
2.25	2
1.74	2
4.25	2
1.98	2
3.08	2
2.21	2
1.45	2
3.6	2
2.66	2
4.31	2
1.95	2
2.66	2
3.17	2
2.24	2
3.06	2
2.65	3
3.58	3
4.35	3
2.46	3
3.43	3
2.3	3
3.07	3
3.34	3
2.12	3
2.8	3
2.51	3
2.22	3
2.86	3
2.27	4
3.3	4
4.1	4
2.78	4
2.39	4
4.14	4
2.56	4
2.52	4
2.14	4
2.48	4
2.11	4
2.34	4
2.44	5
1.61	5
2.28	5
2.8	5
3.25	5
2.51	5
1.67	5
2.36	5
2.76	5
1.85	5
3.15	5
2.35	5
3.45	5
2.22	5
2.35	5
2.43	5
3.78	6
3.25	6
3.34	6
2.62	6
2.96	6
2.78	6
2.23	6
2.99	6
2.96	6
2.39	6
2.22	6
3.9	6
4.44	6
2.08	6
2.11	6
1.45	6
3.1	6
2.79	6
2.25	6
1.59	6
2.36	6
2.58	6
4.1	6
2.73	6
4.19	6
2.53	6
3.87	6
2.79	6
2.39	6
3.01	6
4.63	6
3.69	6
2.77	6
3.39	6
3.38	6
3.23	6
2.84	6
3.2	6
1.49	6
1.68	6
1.75	6
2.4	6
3.23	6
3.56	6
1.36	6
2.64	6
3	6
3.25	6
2.65	6
2.27	6
2.48	6
2.52	6
2.29	6
3.62	6
1.35	6
1.32	7
2.82	7
2.49	7
2.48	7
1.25	7
1.11	7
3.43	7
2.22	7
2.59	7
3.32	7
4.2	7
2.92	7
3.98	7
3.51	7
3.41	7
2.33	7
2.78	7
3.24	7
3.37	7
4.11	7
2.89	7
2.87	7
2.59	7
2.81	7
2.12	7
3.07	7
3.92	7
2.09	7
3.53	7
1.57	8
3.12	8
4.2	8
1.92	8
2.72	8
4.74	8
3.92	8
4.62	8
2.7	8
3.73	8
4.23	8
2.35	8
2.22	8
2.75	8
2.4	8
2.63	8
2.44	8
3.24	8
2.96	8
4.3	8
2.45	8
2.69	8
2.33	8
3.66	8
2.42	8
2.47	8
2.27	8
3.04	8
3.06	8
4.12	8
1.13	9
2.35	9
3.23	9
4.1	9
2.32	9
2.16	9
2.58	9
4.32	9
3.41	9
2.68	9
3.7	9
3.1	9
1.79	9
4.09	9
1.47	9
4.31	9
4.3	9
2.18	9
2.77	9
3.18	9
2.34	9
2.1	9
3.71	9
2.22	9
2.53	9
1.86	9
2.57	9
2.55	9
2.92	9
3.12	9
1.09	9
3.19	9
3.72	9
1.61	9
2.32	9
3.49	9
3.5	9
3.89	9
2.06	9
2.4	10
2.37	10
3.6	10
3.3	10
4.31	10
2.89	10
4.07	10
3.25	10
1.94	10
3.26	10
4.4	10
4.21	10
2.62	10
4.31	10
2.89	10
2.83	10
1.85	10
4.2	10
3.59	10
2.23	10
2.91	10
3.67	10
2.24	10
3.24	10
3.36	10
4.16	10
1.87	10
2.95	10
3.02	10
1.87	10
2.99	10
4.66	10
2.87	10
4.2	11
2.92	11
3.98	11
3.51	11
3.41	11
2.33	11
2.78	11
3.24	11
3.37	11
2.4	11
2.37	11
3.6	11
3.3	11
4.31	11
2.89	11
4.07	11
3.25	11
2.94	11
3.26	11
4.4	11
4.21	11
2.44	11
3.24	11
2.96	11
4.3	11
2.45	11
2.69	11
2.33	11
3.66	11
2.42	11
2.47	11
2.27	11
3.04	11
3.06	11
4.12	11
2.87808
