# Supplementary material for: Impact of Guideline Markings on Saturation Flow Rate at Signalized Intersections
Source: Hindawi journal article supplement (doi:10.1155/2019/1786373), 2019-04-08
Supplement: f1 [file 1786373.f1.zip › 1786373.f1/Through movement/Songhuajiang Rd - Yingkou Rd.xlsx]

## Sheet: Songhuajiang Rd - Yingkou Rd
Headway	Cycle number
2.16	1
2.19	1
1.79	1
2.68	1
2.15	1
2.59	1
5.1	1
1.83	1
3.72	1
2.04	1
2.34	2
2.3	2
1.26	2
2.06	2
1.55	2
2.16	2
2.12	2
2.98	2
3.64	2
1.29	2
2.24	2
2.06	2
2.72	2
1.48	2
3.18	2
1.26	2
3.4	2
3.27	2
2.27	2
1.96	2
2.59	2
1.95	2
3.6	2
1.44	3
1.16	3
1.81	3
2.28	3
3.2	3
2.04	3
3.14	3
2.83	3
4.11	3
2.48	3
1.91	3
1.96	3
2.37	3
2.72	3
3.33	3
2.13	3
1.37	3
2.48	4
1.58	4
2.02	4
1.72	4
3.29	4
1.95	4
5	4
3.8	4
1.2	4
2.64	4
2.23	4
2.02	4
4.62	4
1.7	4
2.51	4
1.7	4
3.16	4
3.75	4
2.79	4
2.19	4
3.2	4
3.27	5
1.99	5
2.55	5
2.74	5
2.93	5
1.56	5
4.9	5
3.95	5
2.17	5
2.29	5
1.74	5
1.01	5
2.26	5
4.36	5
3.12	5
2.04	5
2.73	5
1.97	5
1.69	5
1.56	6
2.68	6
2.13	6
2.61	6
2.76	6
2.61	6
2.75	6
2.03	6
2.41	6
2.46	6
2.27	6
1.71	7
3.26	7
2.04	7
1.46	7
1.94	7
2.44	7
1.98	7
1.96	7
1.74	7
3.61	8
1.38	8
1.46	8
1.64	8
4.84	8
1.89	8
2.9	8
3.75	8
2.96	8
2.56	8
1.6	8
1.7	8
2.03	8
3.02	8
2.09	8
2.03	8
3.76	8
1.48	8
2.85	8
4.01	8
2.53	8
4.43	8
1.08	8
1.42	9
4.2	9
1.28	9
2.05	9
3.98	9
1.9	9
2.91	9
3.75	9
3.55	9
4.23	9
2.5	9
1.95	9
2.66	9
4.2	10
3.08	10
2.61	10
1.12	10
0.92	10
0.75	10
0.9	10
1.51	10
2.12	10
1.19	10
2.23	10
2.64	10
2.37	10
2.3	10
2.12	10
1.64	11
2.99	11
3.84	11
4.62	11
2.06	11
4.32	11
2.47	11
1.46	11
1.43	11
2.1	11
2.09	11
2.04	11
2.03	11
2.38	11
2.51	11
3.49	11
2.2	11
2.87	12
1.64	12
1.65	12
3.17	12
2.16	12
1.45	12
1.8	12
3.78	12
1.42	12
1.94	12
4.02	12
1.96	13
4.06	13
3.86	13
1.67	13
1.83	13
5.34	13
1.9	13
2.72	13
2.85	13
1.49	13
1.07	14
2.03	14
1.54	14
2.21	14
1.67	14
2.14	14
2.43	14
2.99	14
5.38	14
1.42	15
3.74	15
1.61	15
4.73	15
3.02	15
3.31	15
1.44	15
3.49	16
1.47	16
1.8	16
1.6	16
1.76	16
1.85	16
2.3	16
2.67	16
2.67	16
2.71	17
2.48	17
1.85	17
1.65	17
1.76	17
1.62	18
1.86	18
3.66	18
2.27	18
2.39	18
2.98	18
3.91	18
2.7	18
1.64	19
1.95	19
3.86	19
2.77	19
1.65	19
4.49	19
1.78	19
1.63	19
2.73	19
2.03	19
4.2	19
1.39	19
1.85	19
2.83	19
2.28	19
2.56	19
2.21	20
2.63	20
5.48	20
2.13	20
2.94	20
3.87	1
1.57	1
2.3	1
2.05	1
1.78	1
3.28	1
2.17	1
1.32	1
1.53	1
1.61	2
1.91	2
1.56	2
2.6	2
1.77	2
2.33	2
1.6	2
2.39	2
4.76	2
2.03	2
2.9	2
1.68	2
2.61	2
1.77	2
1.83	2
3.77	2
1.71	2
3.9	2
1.7	2
2.4	2
2.83	2
3.02	2
1.73	2
1.79	3
1.84	3
1.46	3
2.38	3
1.83	3
2.01	3
4.07	3
1.49	3
2.13	3
1.58	3
1.72	3
1.65	3
1.59	3
1.75	3
1.38	3
1.94	3
2.6	3
1.92	3
1.75	3
2.55	3
1.73	3
1.92	3
1.96	4
3.03	4
1.44	4
1.36	4
2.42	4
1.91	4
1.86	4
2.48	4
2.85	4
3.77	4
4.51	4
2.26	4
2.68	4
1.56	4
2.31	4
1.46	4
1.65	4
1.89	4
1.9	4
2.09	4
2.61	4
4.03	4
2.74	4
2.3	4
3.37	5
1.27	5
2.14	5
1.48	5
2.5	5
2.29	5
1.92	5
1.57	5
1.88	5
1.69	5
1.58	5
0.93	5
2.37	5
1.63	5
2.75	5
1.36	5
2.93	5
2.38	5
2.34	5
1.73	5
1.95	5
2.45	5
2.23	5
3.05	5
2.03	5
1.89	5
2.46	5
1.79	5
1.95	5
2.41	6
2.5	6
1.98	6
2.95	6
2.68	6
1.83	6
1.73	6
2.99	6
1.45	6
1.84	6
1.64	6
3.8	6
2.08	6
2.31	6
2.16	6
2.05	6
2.66	6
3.38	6
3.22	6
2.75	6
3.9	6
2.65	6
2.63	6
3.09	7
2.23	7
1.79	7
1.57	7
1.98	7
2.6	7
2.86	7
3.3	7
3.67	7
2.66	7
2.47	7
2.15	7
2.41	7
2.38	7
1.87	8
2.4	8
1.92	8
2.16	8
2.44	8
1.72	8
1.99	9
2.4	9
1.86	9
4.2	9
2.05	9
1.51	9
2.39	9
2.15	9
2.1	9
1.42	9
2.86	10
2.57	10
4.86	10
2.15	10
1.7	10
1.89	10
1.86	10
3.9	11
2.37	11
1.22	11
1.13	11
1.96	11
2.19	11
2.76	11
3.13	11
2.24	11
1.32	11
1.8	11
2.53	11
2.53	11
2.55	11
5.04	11
1.49	11
1.07	11
2.12	11
1.45	11
2.98	11
2.75	11
2.24	11
3.58	11
2.43	11
1.45	11
2.52	12
2.22	12
3.5	12
3.75	12
1.61	12
4.19	12
4.11	12
2.73	12
2.2	12
4.06	12
1.37	12
2.19	12
3.85	12
2.57	12
2.04	12
2.73	12
2.25	12
1.78	13
1.96	13
3.78	13
1.87	13
1.15	13
1.61	13
2.41	13
1.73	13
2.58	13
1.75	13
2.19	13
2.15	13
2.09	13
2.42	13
1.83	13
2.89	13
4.05	13
3.89	13
2.51	14
2.62	14
1.52	14
1.62	14
2.15	14
4.29	14
2.57	14
2.82	14
1.75	14
1.78	14
2.33	14
2.16	14
2.79	14
1.43	15
1.85	15
3.75	15
3.26	15
3.62	15
2.42	15
1.4	15
2.73	15
3.95	15
2.37	15
4.7	15
3.32	15
2.16	15
1.64	15
1.52	15
2	16
2.52	16
1.43	16
2.46	16
2.52	16
3.17	16
1.89	16
1.86	16
3.22	16
1.84	16
1.64	16
1.92	16
1.92	16
2.81	16
2.92	16
2.08	17
2.05	17
2.45	17
1.68	17
2.67	17
2.41	18
3.47	18
3.12	18
3.36	18
2.5	18
2.2	18
1.49	18
1.75	18
3.14	18
2.63	18
1.74	18
2.47	18
2.04	18
2.74	18
5.06	18
1.97	18
1.8	18
2.23	19
1.61	19
3.32	19
2.85	19
2.09	19
2.15	19
2.56	19
2.3	19
2.92	19
1.88	19
1.52	20
2.27	20
1.77	20
2.74	20
1.41	20
1.29	20
3.53	20
1.6	20
2.34	20
2.69	20
2.22	21
1.57	21
3.26	21
2.07	21
1.83	21
2.08	21
2.19	21
2.9	21
2.48	22
2.14	22
2.73	22
3.43	22
1.35	22
2.57	22
2.21	22
2.07	22
1.88	22
2.51	22
2.52	22
1.76	22
1.9	22
2.62	22
3.7	22
3.13	23
2.08	23
1.09	23
4.15	23
2.8	23
1.89	23
4.04	23
3.87	23
4.46	23
2.09	23
1.31	23
2.01	23
3.37	23
1.88	23
1.86	24
2.36	24
2.29	24
1.53	24
1.52	24
4.1	24
2.19	24
1.32	24
1.43	24
3.72	24
2.26	24
2.41	24
2.24	24
2.41	24
2.17	24
2.62	24
2.78	24
2.06	24
4.21	24
4.19	24
2.69	24
1.58	24
2.58	24
3.27	24
2.68	24
1.55	24
