# Supplementary material for: Impact of Guideline Markings on Saturation Flow Rate at Signalized Intersections
Source: Hindawi journal article supplement (doi:10.1155/2019/1786373), 2019-04-08
Supplement: f1 [file 1786373.f1.zip › 1786373.f1/Through movement/Zhongshandongyi Rd - Yanan Rd.xlsx]

## Sheet: Zhongshandongyi Rd - Yanan Rd
Headway	Cycle number
1.62	1
1.64	1
1.81	1
1.71	1
3.06	1
1.69	1
3.22	1
2.25	1
2.7	1
2.1	1
2.61	1
2.11	1
3.04	1
2.52	1
2.45	1
1.95	1
2.84	1
2.04	1
3.04	1
2.96	1
2.09	1
2.61	1
2.11	1
2.59	1
2.25	1
3.2	1
4.94	2
2.99	2
3.65	2
1.93	2
4.06	2
2.59	2
2.15	2
3.18	2
3.17	2
3.86	2
2.03	2
1.95	2
3.06	2
2.39	2
2.56	2
2.93	2
1.34	2
2.1	2
1.86	2
3.98	2
1.14	3
1.22	3
4.2	3
2.43	3
3.21	3
2.01	3
1.18	3
4.72	3
1.8	3
2.29	3
3.43	3
2.93	3
3.66	3
1.65	3
3.24	3
2.08	3
1.71	3
1.39	3
2.45	3
4.46	3
0.84	3
1.18	3
2.98	3
2.79	3
3.33	3
1.67	3
2.8	3
1.23	3
2.06	3
1.88	3
3.32	3
1.94	3
3.24	3
2.33	3
1.6	3
1.9	3
3.3	3
3.07	3
2.29	3
2.71	3
2.31	3
3.34	3
4.1	3
3.97	3
1.41	4
1.96	4
1.97	4
1.62	4
1.45	4
2.13	4
2.62	4
2.94	4
2.12	4
3.4	4
1.84	4
1.98	4
2.77	4
2.57	4
1.75	4
1.97	4
1.75	4
1.77	4
2.56	4
3.17	4
2.64	4
3.4	4
1.39	4
2.7	4
1.68	4
2.31	4
2.93	4
2.72	4
2.65	4
2.02	4
2.14	4
2.23	4
1.42	4
1.96	4
1.75	4
3	4
3.28	4
1.99	4
4.2	4
1.97	4
2.43	4
2.66	4
2.26	4
2.1	4
1.49	4
2.44	4
2.71	4
3.24	4
2.87	4
2.54	5
1.27	5
4.65	5
2.11	5
1.76	5
2.13	5
1.84	5
1.83	5
2.74	5
3.24	5
2.24	5
2.16	5
2.95	5
3.3	5
4.29	5
2.75	5
1.83	6
2.33	6
3.7	6
2.4	6
2.83	6
1.47	6
3.81	6
1.6	6
1.96	6
1.62	6
1.89	6
2.28	6
3.31	6
3.15	6
1.95	6
2.89	6
2.31	6
1.39	6
3.27	6
4.46	6
1.66	6
2.52	6
3.69	6
2.7	6
2.47	6
2.43	6
2.21	7
2.43	7
1.37	7
1.92	7
4.07	7
2.5	7
2.04	7
2.25	7
1.98	7
2.61	7
2.71	7
2.37	7
2.05	7
2.31	7
2.35	7
2.12	7
2.91	7
1.48	8
1.37	8
2.46	8
1.72	8
2.21	8
3.77	8
2.3	8
2.54	8
1.87	8
1.64	8
2.77	8
2.22	8
2.74	8
3.04	8
1.93	8
2.02	8
3.06	8
2.3	8
3.03	1
