# Supplementary material for: Impact of Guideline Markings on Saturation Flow Rate at Signalized Intersections
Source: Hindawi journal article supplement (doi:10.1155/2019/1786373), 2019-04-08
Supplement: f1 [file 1786373.f1.zip › 1786373.f1/Through movement/Zhoujiazui Rd - Dalian Rd.xlsx]

## Sheet: Zhoujiazui Rd - Dalian Rd
Headway	Cycle number
2.64	1
1.61	1
2.39	1
2.04	1
1.71	1
	1
2.08	1
2.97	1
2.12	1
2.73	1
2.27	1
2.73	1
1.98	1
2.47	1
4.76	1
1.67	1
1.93	1
1.76	1
2.92	1
3.48	1
3.15	1
4.72	1
1.97	1
2.36	1
1.61	1
	1
2.49	1
	1
3.25	1
2.1	1
2.7	1
2.47	1
1.85	1
2.33	1
2.8	1
2.82	1
3.35	1
3.27	1
	1
4.08	2
2.86	2
3.92	2
2.36	2
2.66	2
2.83	2
3.27	2
2.66	2
1.64	2
2.29	2
2.47	2
1.72	2
2.72	2
3.26	2
2.78	2
1.78	2
2.12	2
4.85	2
4.72	2
1.45	2
2.56	2
1.94	2
3.12	2
	2
3.06	2
2.33	2
4.29	2
2.21	2
1.89	2
1.62	2
2.43	2
1.8	2
1.82	2
1.6	2
1.6	2
1.38	2
3.21	2
1.45	2
1.58	2
1.76	2
1.6	2
3.14	2
2.27	2
1.6	2
1.4	2
2.65	2
2.71	2
1.79	2
2.16	2
2.22	2
3.6	2
2.11	2
3.17	2
1.85	2
	2
4.72	2
3.13	2
3.24	2
2.01	2
2.43	2
2.78	2
2.05	2
1.38	2
2.34	2
3.85	2
1.65	2
1.67	2
1.85	2
1.73	2
1.61	2
1.48	2
2.4	2
1.98	2
	2
3.9	3
2.79	3
2	3
2.76	3
3.75	3
2.38	3
1.5	3
1.67	3
2.24	3
1.97	3
2.25	3
1.49	3
1.47	3
1.77	3
2.26	3
2.04	3
3.1	3
4.71	3
2.21	3
1.89	3
1.53	3
1.95	3
2.44	3
2.93	3
2.11	3
1.84	3
1.23	3
2.01	3
1.31	3
1.58	3
1.25	3
	3
1.69	3
1.09	3
3.39	3
2.58	3
1.74	3
2.63	3
1.85	3
1.45	3
1.5	3
1.99	3
1.26	3
1.63	3
1.99	3
2.26	3
3.04	3
1.86	3
2.07	3
2.33	3
2.21	3
1.79	3
1.68	3
3.19	3
2.75	3
2.23	3
3.4	3
1.66	3
2.27	3
3.16	3
2.28	3
	3
	3
	3
2.9	3
1.81	3
2.52	3
1.78	3
1.39	3
1.59	3
1.64	3
1.58	3
1.9	3
1.72	3
2.04	3
3.38	3
1.92	3
1.89	3
2.31	3
2.31	3
1.85	3
1.67	3
1.98	3
1.37	3
2.41	3
2.62	3
	3
2.82	4
2.81	4
2.14	4
2.93	4
3.7	4
2.26	4
1.4	4
2.32	4
1.53	4
2.1	4
5.19	4
2.35	4
1.75	4
1.49	4
1.47	4
3.79	4
1.97	4
2.11	4
1.3	4
2.04	4
1.69	4
2	4
2.45	4
2.6	4
1.97	4
1.89	4
2.69	4
1.31	4
	4
2.56	4
3.28	4
2.97	4
1.71	4
1.9	4
1.98	4
1.68	4
1.8	4
1.55	4
1.95	4
2.39	4
4.55	4
1.82	4
1.8	4
1.51	4
1.62	4
2.59	4
2.7	4
2.46	4
3.74	4
2.55	4
0.28	4
1.55	4
2.37	4
3.68	4
	4
5.19	5
3.63	5
3.5	5
3.17	5
1.89	5
2.04	5
2.17	5
2.75	5
2	5
1.92	5
3.27	5
2.39	5
2.68	5
2.37	5
1.91	5
2.69	5
2.99	5
	5
2.97	6
2.6	6
2.35	6
3.54	6
2.56	6
3.39	6
1.97	6
2.17	6
1.54	6
4.19	6
3.04	6
1.69	6
1.57	6
1.77	6
2.34	6
1.8	6
1.21	6
1.65	6
2.18	6
2.03	6
1.56	6
0.89	6
1.57	6
2.17	6
	6
4.93	6
3.25	6
2.25	6
1.81	6
1.33	6
1.68	6
2.03	6
2.21	6
4.25	6
1.71	6
2.78	6
2.02	6
3.32	6
1.93	6
1.56	6
2.94	6
2.4	6
2.03	6
1.76	6
1.49	6
1.74	6
1.58	6
1.53	6
1.79	6
1.84	6
1.98	6
	6
1.48	7
1.37	7
2.46	7
3.72	7
2.21	7
3.77	7
2.3	7
4.54	7
1.87	7
2.49	7
1.94	7
2.61	7
1.79	7
2.38	7
4.05	7
1.51	7
2.29	7
3.16	7
3.9	7
1.64	7
3.77	7
2.22	7
3.74	7
3.04	7
1.93	7
2.02	7
3.06	7
2.3	7
3.03	7
3.33	7
2.82	7
2.26	7
2.22	7
2.72	7
4.63	7
2.05	7
2.24	7
2.89	7
1.64	7
1.99	7
1.84	7
2.27	7
2.01	7
1.37	7
4.08	7
2.27	7
2.7	7
2.8	7
3.48	7
1.9	7
3.84	7
2.84	7
2.29	7
