# Supplementary material for: Impact of Guideline Markings on Saturation Flow Rate at Signalized Intersections
Source: Hindawi journal article supplement (doi:10.1155/2019/1786373), 2019-04-08
Supplement: f1 [file 1786373.f1.zip › 1786373.f1/Through movement/Zhoujiazui Rd - Huangxing Rd.xlsx]

## Sheet: Zhoujiazui Rd - Huangxing Rd
Headway	Cycle number
2.69	1
2.68	1
2.68	1
1.53	1
2.25	1
2.61	1
2.51	1
2.04	1
2.76	1
2.43	1
3.21	1
1.76	1
2.24	1
2.85	1
3.7	1
2.85	1
3.02	1
3.27	1
4.62	1
3.19	1
2.47	1
2.35	1
2.1	1
1.73	1
2.95	1
1.94	1
2.53	1
2.3	1
3.36	1
2.35	1
3.18	1
3.78	1
2.92	1
3.83	2
3.11	2
2.92	2
2.27	2
3.96	2
2.94	2
2.16	2
2.8	2
2.57	2
2.01	2
2.65	2
3.03	2
3.61	2
2.29	2
3.43	2
3.7	2
4.94	2
2.42	2
4.99	2
1.92	2
2.29	2
2.93	2
3.3	2
2.15	2
1.8	2
1.73	2
2.41	2
2.76	2
3.32	2
3.25	3
4.66	3
3.78	3
1.72	3
1.82	3
2.02	3
2.08	3
3.16	3
3.08	3
2.67	3
2.9	3
3.49	3
1.87	3
3.09	4
3.68	4
2.16	4
2.38	4
1.55	4
1.83	4
2.18	4
2.37	4
3.8	4
4.62	4
1.99	4
3.03	4
3.66	4
2.84	4
2.46	4
2.56	4
2.87	4
3.03	4
2.47	4
3.92	4
3.53	4
3.56	4
2.64	4
3	4
3.16	4
1.8	5
2.61	5
3.35	5
1.9	5
2.08	5
3.26	5
2.53	5
1.93	5
1.32	5
4.04	5
4.67	5
3.32	5
3.69	5
1.67	5
3.04	5
3.73	5
2.79	5
2.53	5
1.95	5
3.73	5
2.83	5
2.02	5
2.35	5
2.5	5
2.15	5
2.47	5
2.25	5
3.59	5
2.55	5
1.57	5
2.32	5
3.71	5
2.94	5
2.49	5
2.81	5
3.94	5
4.24	5
2.54	5
2.59	5
2.7	5
2.29	5
3.11	5
1.82	5
3.46	5
2.66	5
2.03	5
2.46	5
2.13	5
2.95	5
2.63	5
2.31	5
3.33	5
2.91	5
2.43	6
2.11	6
2.07	6
1.61	6
3.14	6
2.34	6
1.68	6
2.9	6
2.05	6
3.52	6
1.88	6
4.52	6
2.12	6
1.76	6
1.84	6
1.91	6
1.83	6
1.83	6
4.62	6
2.29	6
3.9	6
3.54	7
1.9	7
4.68	7
1.75	7
2.84	7
1.77	7
2.88	7
2.27	7
2.92	7
2.01	7
2.7	7
2.14	7
3.25	7
3.89	7
3.2	7
3.03	7
3.05	7
4.12	7
2.9	7
2.42	7
4.31	7
2.69	7
2.72	7
2.38	7
3.99	7
3.22	7
2.39	7
2.08	7
1.95	7
3.59	7
2.7	8
2.68	8
3.49	8
4.54	8
1.79	8
2.99	8
2.85	8
2.18	8
1.86	8
2.26	8
2.24	8
3.27	8
2.71	8
2.94	8
2.25	8
3.49	8
2.67	8
2.52	8
1.92	8
4.52	8
2.12	8
2.21	8
2.27	8
3.1	8
1.23	9
2.63	9
2.28	9
3.59	9
4.92	9
4.48	10
2.19	10
2.05	10
1.52	10
3.18	10
3.27	10
2.5	10
1.94	10
2.46	10
2.05	10
4.58	10
2.74	10
3.98	10
1.4	10
2.38	10
3.25	10
4.3	10
1.91	10
2.99	10
3.63	10
2.46	10
2.81	10
1.68	10
1.33	10
1.85	10
2.11	10
3.27	10
1.72	10
2.68	10
2.33	10
1.88	10
2.7	10
3.95	10
3.78	11
1.57	11
1.96	11
2.87	11
2.2	11
2.03	11
2.99	11
1.84	11
1.52	11
2.99	11
2.63	11
2.95	11
1.6	11
2.86	11
2.99	11
2.9	11
1.77	11
3.02	11
2.21	11
3.23	11
3.99	11
3.14	11
2.43	11
3.13	11
1.8	11
1.32	11
2.33	11
2.45	11
2.59	11
1.78	11
3.53	11
2.85	11
1.31	11
2.32	11
2.42	11
1.37	12
1.67	12
2.01	12
2.36	12
2.98	12
1.87	12
2.23	12
2.92	12
3.2	12
2.28	12
1.87	12
4.17	12
2.81	12
2.23	12
2.75	12
4.05	12
2.12	12
2.17	12
2.68	12
3.13	12
2.98	12
2.3	12
3.88	12
2.93	12
2.18	12
2.67	12
2.65	12
2.07	12
2.57	12
2.98	13
3.42	13
2.27	13
3.35	13
2.17	13
1.91	13
3.69	13
2.25	13
2.34	13
1.61	13
1.8	13
2.07	13
1.72	13
2.14	13
1.69	13
2.03	13
1.78	13
2.44	13
2.81	13
3.61	13
2.7	13
2.09	13
1.38	13
2.44	13
1.91	13
1.99	13
1.6	13
2.03	13
2.01	13
1.59	13
1.71	13
2.83	13
1.93	13
3.37	13
