# Supplementary material for: Impact of Guideline Markings on Saturation Flow Rate at Signalized Intersections
Source: Hindawi journal article supplement (doi:10.1155/2019/1786373), 2019-04-08
Supplement: f1 [file 1786373.f1.zip › 1786373.f1/Through movement/Zhoujiazui Rd - Longchang Rd.xlsx]

## Sheet: Zhoujiazui Rd - Longchang Rd
Headway	Cycle number
1.21	1
3.09	1
1.81	1
2.17	1
1.55	1
1.45	1
3.47	1
4.22	1
1.55	1
1.82	1
2.2	1
3.2	1
3.19	1
2.74	1
2.86	1
2.81	1
1.69	1
1.43	1
2.27	1
3.65	2
3.17	2
1.58	2
3.61	2
2.45	2
2.76	2
2.04	2
1.79	2
2.58	2
1.84	2
2.8	2
2.02	2
1.64	2
1.55	2
3.52	2
1.85	3
2.18	3
1.88	3
2.27	3
1.6	3
1.92	3
1.79	3
2.46	3
1.73	3
1.56	3
3.07	3
3.45	3
2.12	3
1.9	3
1.56	3
3.37	3
2.59	3
2.33	3
1.58	3
2.42	3
2.11	3
1.76	3
3.27	3
1.48	4
2.45	4
1.86	4
1.17	4
2.5	4
1.47	4
1.81	4
3.59	4
2.36	4
1.49	4
1.54	4
1.57	4
1.72	4
2.56	4
1.84	4
1.83	4
1.86	4
4.19	4
2.25	4
1.79	5
2.7	5
1.41	5
1.72	5
1.94	5
1.18	5
1.63	5
1.75	5
1.29	5
2.18	5
2.2	5
3.76	5
2.01	5
1.59	5
1.51	5
1.9	5
1.76	5
2.72	5
3.35	5
3.62	5
3.24	5
2.72	5
1.75	6
1.98	6
3.77	6
1.97	6
1.63	6
1.73	6
1.77	6
1.71	6
1.75	6
1.79	6
3.32	6
2.27	6
4.23	6
2.07	6
2.33	6
1.73	6
2.6	6
2.21	6
3.13	6
2.55	6
3.09	7
6.52	7
1.73	7
1.81	7
2.69	7
2.44	7
1.97	7
1.85	7
1.81	7
1.29	7
1.95	7
1.64	7
4.62	7
2.72	7
3.54	7
2.1	7
1.71	7
2.89	7
1.57	8
1.68	8
2.94	8
1.52	8
1.64	8
1.32	8
1.65	8
1.78	8
4.35	8
2.78	8
2.2	8
3.35	8
1.77	8
2.04	8
4.42	8
2.4	8
1.8	8
2.7	8
3.3	9
2.36	9
1.45	9
1.42	9
2.4	9
1.59	9
2.85	9
2.5	9
3.37	9
4	9
1.66	9
2.39	9
1.68	9
1.63	9
4.58	9
1.99	9
1.67	9
1.91	9
2.77	9
2.12	9
4.02	9
3.43	9
2.14	10
2.05	10
4.43	10
2.92	10
1.31	10
2.29	10
2.41	10
1.53	10
1.67	10
1.43	10
2.56	10
1.96	10
3.24	10
1.99	10
1.92	10
2.17	10
1.86	10
1.84	10
2.28	10
2.37	10
2.23	10
3.26	10
2.57	11
2.68	11
2.94	11
2.52	11
2.64	11
2.32	11
1.65	11
1.78	11
2.35	11
2.78	11
2.6	11
2.82	11
2.72	11
3.54	11
2.9	11
2.71	11
